# Supplementary material
Source: ML conference proceedings conference paper supplement (https://openreview.net/forum?id=6kSohKYYTn0)
Supplement: supplementary_material [file attachment]

## 440 A Compact Networks for Neural Policies

441 To obtain compact neural representations, there are three common approaches: 1) simply choose  
 442 an RNN with small number of units densely wired to each other (e.g., a long short-term memory,  
 443 LSTM, network [30], or a continuous-time network such as an ordinary differential equation, ODE, -  
 444 based network [40, 31]). 2) sparsify a large network into a smaller system (e.g., lottery ticket winners  
 445 [41], or sparse flows [42]), and 3) use neural circuit policies that are given by sparse architectures  
 446 with added complexity to their neural and synaptic representations but have a light-weighted network  
 447 architecture [3, 4, 32].

448 In the first approach the number of model parameters inversely affect interpretability, i.e., interpret-  
 449 ing wider and/or deeper densely wired RNNs exponentially makes the interpretation of the system  
 450 harder. Sparsity has been shown to help obtain a network with 95% less parameters compared to  
 451 the initial model. However, recent studies show that such levels of sparsity affect the robustness  
 452 of the model, thus make it more susceptible to perturbations [43]. Neural circuit policies (NCPs)  
 453 [4] on the other hand have shown great promise in achieving attractive degrees of generalizabil-  
 454 ity while maintaining robustness to environmental perturbations. This representation learning capa-  
 455 bility is rooted in their ability to capture the true cause and effect of a given task [5]. NCPs  
 456 are sparse network architectures with their nodes and edges determined by a liquid time-constant  
 457 (LTC) concept [3]. The state of a liquid network is described by the following set of ODEs [3]:  
 458  $\frac{d\mathbf{x}(t)}{dt} = -\left[\frac{1}{\tau} + f(\mathbf{x}(t), \mathbf{I}(t), t, \theta)\right] \odot \mathbf{x}(t) + f(\mathbf{x}(t), \mathbf{I}(t), t, \theta) \odot A$ . Here,  $\mathbf{x}^{(D \times 1)}(t)$  is the hidden state  
 459 with size  $D$ ,  $\mathbf{I}^{(m \times 1)}(t)$  is an input signal,  $\tau^{(D \times 1)}$  is the fixed internal time-constant vector,  $A^{(D \times 1)}$   
 460 is a bias parameter, and  $\odot$  is the Hadamard product. In tasks involving spatiotemporal dynamics  
 461 these networks showed significant benefit over their counterparts, both in their ODE form and in  
 462 their closed-form representation termed Closed-form continuous-time (CfC) models [4, 5, 32].

463 **Interpretation of Neuron Responses.** Compact neural representations promise to enable the in-  
 464 terpretability of decision-making by focusing post-hoc analysis on a limited number of neural re-  
 465 sponses. However, having merely a lower-dimensional space for visualization is not sufficient to  
 466 identify consistent behaviors or strategies acquired by a learning agent. Emergent behaviors may  
 467 distribute responses across numerous neurons with a high degree of entanglement. Even for models  
 468 with a small number of neurons, it can be challenging to identify and interpret the behavior corre-  
 469 lated with observed response patterns. In this paper, we hypothesize that abstraction with respect  
 470 to a type of learned strategy within a single neuron is necessary for better interpretability of neural  
 471 policies. We further desire semantic grounding of the neuron response, that is, associating neuron  
 472 response to human-readable representation. The representation space should be abstract enough to  
 473 be human-understandable and expressive enough to capture arbitrary types of emergent behaviors  
 474 or strategies. We adopt the framework of logic programs due to their simple yet effective represen-  
 475 tations of decision-making processes.

## 476 B A Motivating Perspective Of Disentangled Representation

477 The underlying behaviors of neural policies involves descriptions with multiple levels of abstraction,  
 478 from detailed states at every time instance to high-level strategies toward solving a task, spanning  
 479 a continuum where the details can be summarized and reduced to gradually construct their concise  
 480 counterparts. Among these descriptions of behaviors, a right amount of abstraction should be con-  
 481 cise enough for human interpretability yet being sufficiently informative of how neural policies act  
 482 locally toward solving the overall task. Relevant concepts about abstraction have been explored in  
 483 the context of state abstraction in Markov Decision Process (MDP) [44], hierarchical reinforcement  
 484 learning [45], and developmental psychology [46]. In the following, we aim to more formally define  
 485 such abstraction for interpretability of neural policies and draw connection to disentangled repre-  
 486 sentations. First, we define a MDP as a tuple  $\{\mathcal{S}, \mathcal{A}, P_a, R\}$ , where at time instance  $t$ ,  $s_t \in \mathcal{S}$  is the  
 487 state,  $a_t \in \mathcal{A}$  is the action,  $P_a : \mathcal{S} \times \mathcal{A} \times \mathcal{S} \rightarrow [0, 1]$  is the transition function,  $R : \mathcal{S} \times \mathcal{A} \rightarrow \mathbb{R}$  is  
 488 the reward function. The goal of policy learning in a MDP is to find a policy  $\pi : \mathcal{S} \times \mathcal{A} \rightarrow [0, 1]$

that maximizes the expected future return (accumulated reward). The closed-loop dynamics (in deterministic setting) can then be written as

$$s_{t+1} = P_a(s_t, a_t), \text{ where } a_t = \pi(s_t)$$

Then, we construct an abstract MDP, with state presumably being the abstraction we are looking for interpretability, as a tuple  $\{\hat{\mathcal{S}}, \hat{\mathcal{A}}, \hat{P}_a, \hat{R}\}$  that follows similar definition to the above-mentioned regular MDP. It follows the deterministic MDP homomorphism [47, 48] as follows,

$$\begin{aligned} \forall s_t, s_{t+1} \in \mathcal{S}, a_t \in \mathcal{A} \quad & P_a(s_t, a_t) = s_{t+1} \Rightarrow \bar{P}_a(Q(s_t), \bar{A}(a_t)) = Q(s_{t+1}) \\ \forall s_t \in \mathcal{S}, a_t \in \mathcal{A} \quad & R(s_t, a_t) = R(Q(s_t), \bar{A}(a_t)) \end{aligned}$$

where  $Q : \mathcal{S} \rightarrow \hat{\mathcal{S}}$  is the state embedding function and  $\bar{A} : \mathcal{A} \rightarrow \hat{\mathcal{A}}$  is the action embedding function. The state embedding function can also be seen as an action-equivariant map that precisely satisfies the MDP homomorphism [48]. Next, we start to draw connection to disentangled representation from one of its formalism using symmetries and group theory [49]. Informally, disentanglement refers to the level of decomposition in representation that reflects the *factor of variation*. For example, one dimension of vector representations corresponds to color and the other corresponds to shape. In [49], these factor of variations are formally defined as symmetries of world state ( $\mathcal{S}$  in our case). Given group  $G$ , binary operator  $\circ : G \times G \rightarrow G$ , group decomposition into a direct product of subgroups  $G = G_1 \times G_2 \times \dots$ , and group action  $\cdot_X : G \times X \rightarrow X$  with  $X$  as a set which the group action act upon, the idea is to "commute" symmetries from one set  $X$  to the other  $X'$ . Suppose there is a group  $G$  of geometries acting on the world state  $\mathcal{S}$  via action  $\cdot_S : G \times \mathcal{S} \rightarrow \mathcal{S}$ , we would like to find a corresponding action acting on representation  $\cdot_Z : G \times Z \rightarrow Z$  that reflects the symmetric structure of  $\mathcal{S}$  in  $Z$  (in our case neuron response  $z_t \in Z$ ). This entails the equivariance condition,

$$g \cdot_Z E_{\mathcal{S} \rightarrow Z}(s_t) = E_{\mathcal{S} \rightarrow Z}(g \cdot_S s_t)$$

where  $E_{\mathcal{S} \rightarrow Z}$  commutes action across  $\mathcal{S}$  and  $Z$ , and can be called a G-morphism or equivariant map.

$$\begin{array}{ccc} G \times \mathcal{S} & \xrightarrow{\cdot_S} & \mathcal{S} \\ \downarrow \text{id}_G \times E_{\mathcal{S} \rightarrow Z} & & \downarrow E_{\mathcal{S} \rightarrow Z} \\ G \times Z & \xrightarrow{\cdot_Z} & Z \end{array}$$

A more concrete connection of group action to MDP can be seen in the analogy of agent-environment interaction [50],

$$g \cdot_S s_t = s_{t+1} = P_a(s_t, a_t)$$

It is worth emphasizing the distinction of group action  $\cdot_S$  and regular action  $a_t$ : not all regular action  $a_t$  exhibit symmetry, as pointed out in [50]. And the group action upon neural state  $\cdot_Z$  can be viewed as the transition dynamics of neural policies,

$$g \cdot_Z z_t = z_{t+1} = \pi_z(z_t) = \pi_s(P_a(s_t, \pi_a(z_t)))$$

where  $\pi = \pi_a \circ \pi_s, \pi_a : Z \rightarrow \mathcal{A}, \pi_s : \mathcal{S} \rightarrow Z$  is simply the decomposition of neural policies to explicitly extract neuron responses  $z_t$  and  $\pi_z : Z \rightarrow Z$  is the transition function of neural states (note that this does not necessarily require recurrence structure of neural policies; instead this is more of a convenient notation here). Following the definition of [49], an agent's representation  $Z$  is disentangled with respect to the decomposition  $G = G_1 \times G_2 \times \dots$  if

1. There is a group action  $\cdot_Z : G \times Z \rightarrow Z$ .
2. The map  $E_{\mathcal{S} \rightarrow Z} : \mathcal{S} \rightarrow Z$  is equivariant between the group actions on  $\mathcal{S}$  and  $Z$ .
3. There is a decomposition  $Z = Z_1 \times Z_2 \times \dots$  such that each  $Z_i$  is fixed by the actions of all  $G_j, j \neq i$  and affected only by  $G_i$ .

For the first condition, We already define  $\cdot_Z$  in the above. For the second condition, we show that the equivariant map can follow the definition  $E_{\mathcal{S} \rightarrow Z} = \pi_z \circ \pi_s$ , i.e.,  $z_{t+1} = E_{\mathcal{S} \rightarrow Z}(s_t)$ . This follows the proof as,

$$g \cdot_Z E_{\mathcal{S} \rightarrow Z}(s_t) = g \cdot_Z z_{t+1} = \pi_z(z_{t+1}) = \pi_z(\pi_s(s_{t+1})) = (\pi_z \circ \pi_s)(s_{t+1}) = E_{\mathcal{S} \rightarrow Z}(g \cdot_S s_t)$$

Next, extending the formalism of disentangled representation in [49] with the above-mentioned MDP homomorphism [47], we define the equivariance condition between the regular MDP  $\{\mathcal{S}, \mathcal{A}, P_a, R\}$  and the abstract MDP  $\{\hat{\mathcal{S}}, \hat{\mathcal{A}}, \hat{P}_a, \hat{R}\}$ ,

$$g \cdot_{\mathcal{S}} E_{\hat{\mathcal{S}} \rightarrow \mathcal{S}}(\hat{s}_t) = E_{\hat{\mathcal{S}} \rightarrow \mathcal{S}}(g \cdot_{\hat{\mathcal{S}}} \hat{s}_t)$$

where  $E_{\hat{\mathcal{S}} \rightarrow \mathcal{S}}$  commutes action across  $\hat{\mathcal{S}}$  and  $\mathcal{S}$ , and can be defined with MDP homomorphism,

$$\begin{aligned} \hat{s}_{t+1} &= Q(s_{t+1}) \\ \hat{P}_a(\hat{s}_t, \hat{a}_t) &= Q(P_a(s_t, a_t)) \\ g \cdot_{\hat{\mathcal{S}}} \hat{s}_t &= Q(g \cdot_{\mathcal{S}} s_t) \\ Q^{-1}(g \cdot_{\hat{\mathcal{S}}} \hat{s}_t) &= g \cdot_{\mathcal{S}} Q^{-1}(\hat{s}_t) \\ E_{\hat{\mathcal{S}} \rightarrow \mathcal{S}} &= Q^{-1} \end{aligned}$$

Note that theoretically the state embedding function  $Q$  may not have an inverse mapping since going from  $\mathcal{S}$  to  $\hat{\mathcal{S}}$  is supposed to be more abstract (and thus concise with equal or less information). However, this does not matter since we don't necessarily require this recipe to tell us how exactly group actions in  $\hat{\mathcal{S}}$  commute to  $\mathcal{S}$ . Overall, we establish the following group homomorphism across set  $\hat{\mathcal{S}}$ ,  $\mathcal{S}$ , and  $Z$ ,

$$\begin{array}{ccc} G \times \hat{\mathcal{S}} & \xrightarrow{\cdot_{\hat{\mathcal{S}}}} & \hat{\mathcal{S}} \\ \downarrow id_G \times E_{\hat{\mathcal{S}} \rightarrow \mathcal{S}} & & \downarrow E_{\hat{\mathcal{S}} \rightarrow \mathcal{S}} \\ G \times \mathcal{S} & \xrightarrow{\cdot_{\mathcal{S}}} & \mathcal{S} \\ \downarrow id_G \times E_{\mathcal{S} \rightarrow Z} & & \downarrow E_{\mathcal{S} \rightarrow Z} \\ G \times Z & \xrightarrow{\cdot_Z} & Z \end{array}$$

This connects *the right amount of abstraction for interpretability* discussed in the beginning, then associated with MDP homomorphism, to *factor of variation* in disentangled representation, which is formalized by symmetry and group theory. Disentanglement in  $Z$  can then be lifted to symmetries in abstract state space  $\hat{\mathcal{S}}$ . In [49], disentanglement of representation is lifted up to the symmetries in the world state space  $\mathcal{S}$ , e.g., a factor of group decomposition  $G_i$  can be color of an object. However, this is not sufficient to describe the behavior of policies since  $\mathcal{S}$  lacks task structure. Hence, we further go from  $\mathcal{S}$  to  $\hat{\mathcal{S}}$  with MDP homomorphism to capture the essence of solving a task. The factor of group decomposition  $G_i$  can then be task-related, e.g., relative pose to a target object (which may be of high interest for tasks like object tracking, and less so for tasks like locomotion). Overall, this provides a motivation to cast the problem of searching for proper description of the behavior of neural policies (for interpretability) to searching for disentanglement in neuron responses. In this paper, we therefore study how to measure interpretability of compact neural policies with disentangled representation.

## C Calibration Of Mutual Information

**Lemma C.1.** *The calibration term  $I[z^j; \mathcal{P}_k] - I[z^j; \mathcal{P}_k; \mathcal{P}_{k^j}]$  in both MIG (5) and Modularity (6) metrics, for  $j \neq i^*$ , without loss of generality has the following lower bound:*

$$I[z^j; \mathcal{P}_k] - I[z^j; \mathcal{P}_k; \mathcal{P}_{k^j}] \geq \max(0, I[z^j; \mathcal{P}_k] - I[\mathcal{P}_k; \mathcal{P}_{k^j}]) \quad (7)$$

Lemma C.1 is necessary because to compute the calibration term, we need access to the conditional distribution of the random variable  $(\mathcal{P}_{k^j}|z^j)$ , which is normally inaccessible. Hence, we derive a lower bound for the calibrated mutual information.

*Proof.* In the main paper, we adapting Mutual Information Gap (MIG) [20] to our framework as,

$$\frac{1}{K} \sum_{k=1}^K \frac{1}{H[\mathcal{P}_k]} \left( I[z^{i^*}; \mathcal{P}_k] - \max_{j \neq i^*} I[z^j; \mathcal{P}_k] - I[z^j; \mathcal{P}_k; \mathcal{P}_{k^j}] \right)$$

554 and Modularity score [28] as,

$$\frac{1}{|\mathcal{I}|} \sum_{i \in \mathcal{I}} 1 - \frac{\sum_{k \neq k^*} (I[z^i; \mathcal{P}_k] - I[z^i; \mathcal{P}_k; \mathcal{P}_{k^*}])^2}{(K-1)I[z^i; \mathcal{P}_{k^*}]^2}$$

555 Both involve the computation of  $I[z^j; \mathcal{P}_k; \mathcal{P}_{k^*}]$ . Without loss of generality for both cases (and with  
556 the notation of MIG), we simplify the calibration term for  $j \neq i^*$  as follows,

$$\begin{aligned} & I[z^j; \mathcal{P}_k] - I[z^j; \mathcal{P}_k; \mathcal{P}_{k^*}] \\ &= I[z^j; \mathcal{P}_k] - (I[z^j; \mathcal{P}_k] - I[z^j; \mathcal{P}_k | \mathcal{P}_{k^*}]) \\ &= I[z^j; \mathcal{P}_k | \mathcal{P}_{k^*}] \\ &= I[z^j; \mathcal{P}_k] + H[\mathcal{P}_{k^*} | z^j] + H[\mathcal{P}_{k^*} | \mathcal{P}_k] - H[\mathcal{P}_{k^*} | z^j, \mathcal{P}_k] - H[\mathcal{P}_{k^*}] \\ &= I[z^j; \mathcal{P}_k] - (H[\mathcal{P}_{k^*}] - H[\mathcal{P}_{k^*} | \mathcal{P}_k]) + (H[\mathcal{P}_{k^*} | z^j] - H[\mathcal{P}_{k^*} | z^j, \mathcal{P}_k]) \\ &= I[z^j; \mathcal{P}_k] - I[\mathcal{P}_k; \mathcal{P}_{k^*}] + I[\mathcal{P}_{k^*} | z^j; \mathcal{P}_k] \\ &\geq \max(0, I[z^j; \mathcal{P}_k] - I[\mathcal{P}_k; \mathcal{P}_{k^*}]) \end{aligned}$$

557 Most steps simply follow identities of mutual information and entropy. The last step requires access  
558 to the conditional distribution of random variable  $(\mathcal{P}_{k^*} | z^j)$ , which is normally inaccessible. Hence,  
559 we introduce an approximation that serves as a lower bound for the calibrated mutual information  
560 in our implementation.  $\square$

## 561 D Other Quantitative Measures

562 **Decision Path Accuracy.** During deployment, we use an inverse proxy  $q_{\phi^i}$  for the decision tree  
563  $T_{\theta^i}$  and hence we compute the approximation error by measuring the accuracy of a state-grounded  
564 decision path inferred from the neuron response with  $q_{\phi^i}$  compared to true states,

$$\frac{1}{|\mathcal{I}|} \sum_{i \in \mathcal{I}} \frac{1}{|\mathcal{D}_{\text{dt}}|} \sum_{(s_t, z_t^i) \in \mathcal{D}_{\text{dt}}} \frac{1}{|q_{\phi^i}(z_t^i)|} \sum_{\substack{n \in q_{\phi^i}(z_t^i) \\ j=g(n)}} \mathbb{1}[s_t^j \leq c_n] \quad (8)$$

565 where  $\mathbb{1}$  is an indicator function,  $q_{\phi^i}(z_t^i)$  is the inferred decision path with norm as number of  
566 decision rules. The condition  $s_t^j \leq c_n$  validates if the current state  $s_t^j$  complies with the inferred rule  
567 defined by  $c_n$  (which is from  $T_{\theta^i}$ ). Since the discrepancy is computed at the decision rule level, it  
568 captures not only the error of the classifier model  $q_{\phi^i}$  but also how accurately  $f_{\mathcal{S}}^i$  parses  $z_t^i$ .

569 **Cross-neuron Logic Conflict.** When interpreting a neural policy as a whole instead of inspecting  
570 individual neuron response, it is straightforward to find the intersection across logic programs ex-  
571 tracted from different neurons  $l_t = \text{reduce}(\bigwedge_{i \in \mathcal{I}} l_t^i)$ , where **reduce** summarizes and reduces logic  
572 programs to a more compact one. Intuitively, the neuron-wise logic program should summarize the  
573 operational domain of the strategy currently executed by the neuron, where intersection describes  
574 the domain of a joint strategy across neurons. However, the reduction of intersection can be invalid  
575 if there is conflict in the logical formulae across neurons, e.g.,  $a \leq 3$  from the first neuron and  
576  $a \geq 4$  from the second neuron. The conflict may imply, under the same configuration of  $f_{\mathcal{S}}$ , that (1)  
577 the policy fails to learn compatible strategies across neurons or (2) there is an error induced by the  
578 interpreter due to insufficient or ambiguous connection between the logic program and the neuron  
579 response, which implicitly indicates lack of interpretability.

580 **Experimental Results.** For classical control, we verify in Table 7 that all models achieve compara-  
581 ble performance when learning toward target -500 episode reward. For locomotion, in Table 8, most  
582 models achieve comparable task performance except for GRU and ODE-RNN being slightly worse.  
583 For end-to-end visual servoing, in Table 9, all models achieve good performance ( $> 0.9$ ) except for  
584 ODE-RNN, which fails to learn a good policy within maximal training iterations.

Table 7: Other quantitative results of classical control.

| Network Architecture | Decision Path Accuracy $\uparrow$ | Logic Conflict $\downarrow$ | Performance $\uparrow$ |
|----------------------|-----------------------------------|-----------------------------|------------------------|
| FCs                  | 0.3015                            | 0.2104                      | -488.55                |
| GRU                  | 0.2504                            | 0.2832                      | -559.82                |
| LSTM                 | 0.2392                            | 0.5072                      | <b>-467.95</b>         |
| ODE-RNN              | 0.2980                            | 0.2506                      | -533.93                |
| CfC                  | 0.2509                            | <b>0.1556</b>               | -489.28                |
| NCP                  | <b>0.4726</b>                     | 0.2026                      | -556.64                |

Table 8: Other quantitative results of locomotion.

| Network Architecture | Decision Path Accuracy $\uparrow$ | Logic Conflict $\downarrow$ | Performance $\uparrow$ |
|----------------------|-----------------------------------|-----------------------------|------------------------|
| FCs                  | 0.5285                            | <b>0.1035</b>               | 5186.50                |
| GRU                  | 0.4924                            | 0.1500                      | 3857.21                |
| LSTM                 | 0.5283                            | 0.2155                      | 4122.74                |
| ODE-RNN              | 0.4959                            | 0.1474                      | 3472.69                |
| CfC                  | 0.4841                            | 0.1581                      | 5195.46                |
| NCP                  | <b>0.5859</b>                     | 0.1105                      | <b>5822.73</b>         |

## E Implementation Details

NCPs are designed by a four-layer structure consisting of sensory neurons (input layer), interneurons, command neurons (with recurrent connections), and motor neurons (output layer). To make a fair comparison, we augment all non-NCP models by a feed-forward layer, which is of equivalent size to the inter-neuron layer in NCPs.

### E.1 Classical Control (Pendulum)

**Network Architecture.** With 3-dimensional observation space and 1-dimensional action space, we use the following network architecture for compact neural policies.

- *FCs*: a  $3 \rightarrow 10 \rightarrow 4 \rightarrow 1$  fully-connected network with *tanh* activation.
- *GRU*: a  $3 \rightarrow 10$  fully-connected network with *tanh* activation followed by GRU with cell size of 4, outputting a 1-dimensional action.
- *LSTM*: a  $3 \rightarrow 10$  fully-connected network with *tanh* activation followed by LSTM with hidden size of 4, outputting a 1-dimensional action. Note that this effectively gives 8 cells by considering hidden and cell states.
- *ODE-RNN*: a  $3 \rightarrow 10$  fully-connected network with *tanh* activation followed by a neural ODE with recurrent component both of size 4, outputting a 1-dimensional action.
- *CfC*: with backbone layer = 1, backbone unit = 10, backbone activation *silu*, hidden size = 4 without gate and mixed memory, outputting a 1-dimensional action.
- *NCP*: with 3 sensory neurons, 10 interneuron, 4 command neurons, 1 motor neuron, 4 output sensory synapses, 3 output inter-synapses, 2 recurrent command synapse, 3 motor synapses.

For all policies, we use a  $3 \rightarrow 64 \rightarrow 64 \rightarrow 1$  fully-connected networks with *tanh* activation as value function. We interpret the layer of size 4 for each policy.

**Training details.** We use PPO with the following parameters for all models. Learning rate is 0.0003. Train batch size (of an epoch) is 512. Mini-batch size is 64. Number of iteration within a batch is 6. Value function clip parameter is 10.0. Discount factor of the MDP is 0.95. Generalized advantage estimation parameter is 0.95. Initial coefficient of KL divergence is 0.2. Clip parameter is 0.3. Training halts if reaching target average episode reward 150. Maximal training steps is 1M.

Table 9: Other quantitative results of visual servoing.

| Network Architecture | Decision Path Accuracy $\uparrow$ | Logic Conflict $\downarrow$ | Performance $\uparrow$ |
|----------------------|-----------------------------------|-----------------------------|------------------------|
| FCs                  | 0.5379                            | 0.1354                      | <b>1.0000</b>          |
| GRU                  | <b>0.6160</b>                     | 0.1884                      | 0.9210                 |
| LSTM                 | 0.5174                            | 0.4504                      | <b>1.0000</b>          |
| ODE-RNN              | 0.5483                            | 0.3786                      | 0.4239                 |
| CfC                  | 0.5549                            | 0.2274                      | 0.9922                 |
| NCP                  | 0.5960                            | <b>0.1067</b>               | <b>1.0000</b>          |

**Interpreter details.** For the decision tree  $T_{\theta^i}$ , we set minimum number of samples required to be at a leaf node as 10% of the training data, criterion of a split as mean squared error with Friedman’s improvement score, the maximum depth of the tree as 3, complexity parameter used for minimal cost-complexity pruning as 0.003; we use scikit-learn implementation of CART (Classification and Regression Trees). For simplicity, we use another decision tree as decision path classifier  $q_{\phi^i}$  with maximal depth of tree as 3, minimum number of samples in a leaf node as 1% of data, complexity parameter for pruning as 0.01, criterion as Gini impurity. The state grounding  $\mathcal{S}$  of the interpreter  $f_S^i$  is  $\{\theta, \dot{\theta}\}$ , where  $\theta$  is joint angle and  $\dot{\theta}$  is joint angular velocity.

## E.2 Locomotion (HalfCheetah)

**Network Architecture.** With 17-dimensional observation space and 6-dimensional action space, we first use feature extractors of a shared architecture as a  $17 \rightarrow 256$  fully-connected network, which then output features to compact neural policies with the following architectures,

- *FCs*: a  $256 \rightarrow 20 \rightarrow 10 \rightarrow 6$  fully-connected network with *tanh* activation.
- *GRU*: a  $256 \rightarrow 20$  fully-connected network with *tanh* activation followed by GRU with cell size of 10, outputting a 6-dimensional action.
- *LSTM*: a  $256 \rightarrow 20$  fully-connected network with *tanh* activation followed by LSTM with hidden size of 10, outputting a 6-dimensional action. Note that this effectively gives 20 cells by considering hidden and cell states.
- *ODE-RNN*: a  $256 \rightarrow 20$  fully-connected network with *tanh* activation followed by a neural ODE with recurrent component both of size 10, outputting a 6-dimensional action.
- *CfC*: with backbone layer = 1, backbone unit = 20, backbone activation *silu*, hidden size = 10 without gate and mixed memory.
- *NCP*: with 256 sensory neurons, 20 interneuron, 10 command neurons, 6 motor neuron, 4 output sensory synapses, 5 output inter-synapses, 6 recurrent command synapse, 4 input motor synapses.

For all policies, we use a  $17 \rightarrow 256 \rightarrow 256 \rightarrow 1$  fully-connected networks with *tanh* activation as value function. We interpret the layer of size 10 for each policy.

**Training details.** We use PPO with the following parameters for all models. Learning rate is 0.0003. Train batch size (of an epoch) is 65536. Mini-batch size is 4096. Number of iteration within a batch is 32. Value function coefficient is 10.0. Discount factor of the MDP is 0.99. Generalized advantage estimation parameter is 0.95. Initial coefficient of KL divergence is 1.0. Clip parameter is 0.2. Gradient norm clip is 0.5. Training halts if reaching target average episode reward  $-500$ . Maximal training steps is 12M.

**Interpreter details.** For the decision tree  $T_{\theta^i}$ , we set minimum number of samples required to be at a leaf node as 10% of the training data, criterion of a split as mean squared error with Friedman’s improvement score, the maximum depth of the tree as 3, complexity parameter used for minimal cost-complexity pruning as 0.001; we use scikit-learn implementation of CART (Classification and Regression Trees). For simplicity, we use another decision tree as decision path classifier  $q_{\phi^i}$  with

maximal depth of tree as 3, minimum number of samples in a leaf node as 1% of data, complexity parameter for pruning as 0.01, criterion as Gini impurity. The state grounding  $\mathcal{S}$  of the interpreter  $f_S^i$  is  $\{h_R, \theta_R, \theta_{T,B}, \theta_{S,B}, \theta_{F,B}, \theta_{T,F}, \theta_{S,F}, \theta_{F,F}, \dot{x}_R, \dot{h}_R, \dot{\theta}_R, \dot{\theta}_{T,B}, \dot{\theta}_{S,B}, \dot{\theta}_{F,B}, \dot{\theta}_{T,F}, \dot{\theta}_{S,F}, \dot{\theta}_{F,F}\}$ , where  $h_R, \dot{h}_R$  are position and velocity of z-coordinate of the front tip,  $\theta_R, \dot{\theta}_R$  are angle and angular velocity of the front tip,  $\theta_{T,B}, \dot{\theta}_{T,B}$  are angle and angular velocity of the thigh in the back,  $\theta_{S,B}, \dot{\theta}_{S,B}$  are angle and angular velocity of the shin in the back,  $\theta_{F,B}, \dot{\theta}_{F,B}$  are angle and angular velocity of the foot in the back,  $\theta_{T,T}, \dot{\theta}_{T,T}$  are angle and angular velocity of the thigh in the front,  $\theta_{S,T}, \dot{\theta}_{S,T}$  are angle and angular velocity of the shin in the front,  $\theta_{F,T}, \dot{\theta}_{F,T}$  are angle and angular velocity of the foot in the front,  $\dot{x}_R$  is the velocity of x-coordinate of the front tip.

### 660 E.3 End-to-end visual servoing (Image-based Driving)

**661 Network Architecture.** With image observation space of size (200, 320, 3) and 2-dimensional action space, we first use feature extractors of a shared architecture as a convolutional neural network (CNN) in Table 10, which then output features to compact neural policies with the following architectures,

- 665 • *FCs*: a  $1280 \rightarrow 20 \rightarrow 8 \rightarrow 2$  fully-connected network with *tanh* activation.
- 666 • *GRU*: a  $1280 \rightarrow 20$  fully-connected network with *tanh* activation followed by GRU with cell size of 8, outputting a 2-dimensional action.
- 667
- 668 • *LSTM*: a  $1280 \rightarrow 20$  fully-connected network with *tanh* activation followed by LSTM with hidden size of 8, outputting a 2-dimensional action. Note that this effectively gives 20 cells by considering hidden and cell states.
- 669
- 670
- 671 • *ODE-RNN*: a  $1280 \rightarrow 20$  fully-connected network with *tanh* activation followed by a neural ODE with recurrent component both of size 8, outputting a 2-dimensional action.
- 672
- 673 • *CfC*: with backbone layer = 1, backbone unit = 20, backbone activation *silu*, hidden size = 8 without gate and mixed memory.
- 674
- 675 • *NCP*: with 1280 sensory neurons, 20 interneuron, 8 command neurons, 2 motor neuron,
- 676 4 output sensory synapses, 5 output inter-synapses, 6 recurrent command synapse, 4 input motor synapses.
- 677

**678 Training details.** Batch size is 64. Sequence size is 10. Learning rate is 0.001. Number of epochs is 10. We perform data augmentation on RGB images with randomized gamma of range [0.5, 1.5], brightness of range [0.5, 1.5], contrast of range [0.7, 1.3], saturation of range [0.5, 1.5].

**681 Interpreter details.** For the decision tree  $T_{\theta^i}$ , we set minimum number of samples required to be at a leaf node as 10% of the training data, criterion of a split as mean squared error with Friedman’s improvement score, the maximum depth of the tree as 3, complexity parameter used for minimal cost-complexity pruning as 0.003; we use scikit-learn implementation of CART (Classification and Regression Trees). For simplicity, we use another decision tree as decision path classifier  $q_{\phi^i}$  with maximal depth of tree as 3, minimum number of samples in a leaf node as 1% of data, complexity parameter for pruning as 0.01, criterion as Gini impurity. The state grounding  $\mathcal{S}$  of the interpreter  $f_S^i$  is  $\{v, \delta, d, \Delta l, \mu, \kappa\}$ , where  $v$  is vehicle speed,  $\delta$  is heading,  $d$  is lateral deviation from the lane center,  $\Delta l$  is longitudinal deviation from the lane center,  $\mu$  is local heading error with respect to the lane center,  $\kappa$  is road curvature.

### 691 F Robustness Analysis

692 We propose to study the interpretability of neural policies through decision trees and present several quantitative measures of interpretability by analyzing various properties on top of neuron responses and corresponding decision trees, including *Neural-Response Variance*, *Mutual Information Gap*, *Modularity*, *Decision Path Accuracy*, and *Logic Conflict*. However, the extracted decision trees may differ across different configurations. Hence, to validate the robustness of the proposed metrics to hyperparameters, we compute all metrics with different decision tree parameters in classical control



| Layer             | Hyperparameters         |
|-------------------|-------------------------|
| Conv2d            | (3, 24, 5, 2, 2)        |
| GroupNorm2d       | (16, 1e-5)              |
| ELU               | -                       |
| Dropout           | 0.3                     |
| Conv2d            | (24, 36, 5, 2, 2)       |
| GroupNorm2d       | (16, 1e-5)              |
| ELU               | -                       |
| Dropout           | 0.3                     |
| Conv2d            | (36, 48, 3, 2, 1)       |
| GroupNorm2d       | (16, 1e-5)              |
| ELU               | -                       |
| Dropout           | 0.3                     |
| Conv2d            | (48, 64, 3, 1, 1)       |
| GroupNorm2d       | (16, 1e-5)              |
| ELU               | -                       |
| Dropout           | 0.3                     |
| Conv2d            | (64, 64, 3, 1, 1)       |
| AdaptiveAvgPool2d | reduce height dimension |

Table 10: Network architecture of CNN feature extractor for end-to-end visual servoing. Hyperparameters for *Conv2d* are input channel, output channel, kernel size, stride, and padding; for *GroupNorm2d*, they are group size and epsilon; for *Dropout*, it is drop probability.

environment (Pendulum). We report the averaged results with 5 random seeds in Table 11 (*Neural-Response Variance*), Table 12 (*Mutal Information Gap*), Table 13 (*Modularity*), Table 14 (*Decision Path Accuracy*), Table 15 (*Logic Conflict*). Most metrics (variance, MI-gap, decision path accuracy, logic conflict) yield consistent top-1 results and agree with similar rankings among network architectures, except for modularity that is slightly less robust against hyperparameters yet still consistent in the top-3 set of models. This results demonstrate the reliability of the proposed interpretability analysis for neural policies.

Table 11: Robustness to hyperparameters for *Neural-Response Variance*. The results are averaged across 5 random seeds in classical control (Pendulum).

| [Variance ↓] Network Architecture |       | FCs    | GRU    | LSTM          | ODE-RNN | CfC    | NCP           |
|-----------------------------------|-------|--------|--------|---------------|---------|--------|---------------|
| Cost Complexity Pruning           | 0.001 | 0.0232 | 0.0304 | 0.0209        | 0.0266  | 0.0254 | <b>0.0207</b> |
|                                   | 0.003 | 0.0242 | 0.0329 | <b>0.0216</b> | 0.0287  | 0.0272 | 0.0240        |
|                                   | 0.01  | 0.0261 | 0.0371 | <b>0.0221</b> | 0.0315  | 0.0267 | 0.0305        |
| Minimal Leaf Sample Ratio         | 0.01  | 0.0154 | 0.0261 | <b>0.0138</b> | 0.0193  | 0.0189 | 0.0186        |
|                                   | 0.1   | 0.0242 | 0.0329 | <b>0.0216</b> | 0.0287  | 0.0272 | 0.0240        |
|                                   | 0.2   | 0.0334 | 0.0387 | <b>0.0284</b> | 0.0354  | 0.0295 | 0.0285        |

Table 12: Robustness to hyperparameters for *Mutual Information Gap*. The results are averaged across 5 random seeds in classical control (Pendulum).

| [MI-Gap ↑] Network Architecture |       | FCs           | GRU    | LSTM   | ODE-RNN | CfC    | NCP           |
|---------------------------------|-------|---------------|--------|--------|---------|--------|---------------|
| Cost Complexity Pruning         | 0.001 | 0.0284        | 0.2686 | 0.2026 | 0.2891  | 0.2544 | <b>0.3403</b> |
|                                 | 0.003 | 0.3008        | 0.2764 | 0.2303 | 0.3062  | 0.2892 | <b>0.3653</b> |
|                                 | 0.01  | 0.3482        | 0.3065 | 0.2547 | 0.3142  | 0.3567 | <b>0.3664</b> |
| Minimal Leaf Sample Ratio       | 0.01  | 0.2824        | 0.2632 | 0.2040 | 0.2819  | 0.2433 | <b>0.3456</b> |
|                                 | 0.1   | 0.3008        | 0.2764 | 0.2303 | 0.3062  | 0.2892 | <b>0.3653</b> |
|                                 | 0.2   | <b>0.3798</b> | 0.3387 | 0.2528 | 0.3168  | 0.3342 | 0.3429        |



Table 13: Robustness to hyperparameters for *Modularity*. The results are averaged across 5 random seeds in classical control (Pendulum).

| [Modularity $\uparrow$ ]<br>Network Architecture |       | FCs           | GRU           | LSTM   | ODE-RNN | CfC    | NCP           |
|--------------------------------------------------|-------|---------------|---------------|--------|---------|--------|---------------|
| Cost Complexity Pruning                          | 0.001 | <b>0.9519</b> | 0.9558        | 0.9327 | 0.9485  | 0.9228 | 0.9438        |
|                                                  | 0.003 | 0.9471        | 0.9550        | 0.9402 | 0.9486  | 0.9116 | <b>0.9551</b> |
|                                                  | 0.01  | 0.9532        | <b>0.9598</b> | 0.9445 | 0.9487  | 0.8970 | 0.9593        |
| Minimal Leaf Sample Ratio                        | 0.01  | 0.9638        | <b>0.9702</b> | 0.9547 | 0.9630  | 0.9333 | 0.9651        |
|                                                  | 0.1   | 0.9471        | 0.9550        | 0.9402 | 0.9486  | 0.9116 | <b>0.9551</b> |
|                                                  | 0.2   | <b>0.9475</b> | 0.9372        | 0.9197 | 0.9404  | 0.8755 | 0.9301        |

Table 14: Robustness to hyperparameters for *Decision Path Accuracy*. The results are averaged across 5 random seeds in classical control (Pendulum).

| [Decision Path Accuracy $\uparrow$ ]<br>Network Architecture |       | FCs    | GRU    | LSTM   | ODE-RNN | CfC    | NCP           |
|--------------------------------------------------------------|-------|--------|--------|--------|---------|--------|---------------|
| Cost Complexity Pruning                                      | 0.001 | 0.2815 | 0.2415 | 0.2195 | 0.2904  | 0.2250 | <b>0.4294</b> |
|                                                              | 0.003 | 0.3015 | 0.2504 | 0.2392 | 0.2980  | 0.2509 | <b>0.4726</b> |
|                                                              | 0.01  | 0.3074 | 0.3330 | 0.3161 | 0.3707  | 0.2864 | <b>0.4390</b> |
| Minimal Leaf Sample Ratio                                    | 0.01  | 0.2950 | 0.2637 | 0.2270 | 0.2574  | 0.2452 | <b>0.4287</b> |
|                                                              | 0.1   | 0.3015 | 0.2504 | 0.2392 | 0.2980  | 0.2509 | <b>0.4726</b> |
|                                                              | 0.2   | 0.3572 | 0.3587 | 0.2794 | 0.3322  | 0.2784 | <b>0.4684</b> |

## G Counterfactual Analysis via Removal of Neurons

There exist some neurons with logic programs that are sensible but may have little effect on task performance. For example, in NCPs (not confined to this specific architecture but just focus on it for discussion), we find a neuron that aligns its response purely with vehicle speed. Given the task objective is lane following without crashing, such neuron pays attention to useful (for temporal reasoning across frames) but relatively unnecessary (to the task) information. Furthermore, there are neurons that don't exhibit sufficient correlation with any of the environment state and fail to induce decision branching. In light of these observation, we try to remove neurons that we suspect to have little influence on the performance by inspecting their logic program. We show the results in Table 16. Removing neurons 3, 4, 7 has a marginal impact on task performance. Among them, neuron 3 and 4 mostly depends on vehicle speed  $v$  with a small tendency to the lateral deviation  $d$ . Neuron 7 fails to split a tree.

## H Interpretation Of Driving Maneuver

In Figure 3, we describe interpretations similar to classical control (for a neuron in NCP). While the state space of driving is higher dimensional (5 with bicycle model for lane following), states of interest only include local heading error  $\mu$  and lateral deviation from the lane center  $d$  in lane following task. We compute the statistics and plot neuron response and closed-loop dynamics in the  $d$ - $\mu$  phase portrait. This specific neuron develops more fine-grained control for situations when the vehicle is on the right of the lane center, as shown in Figure 3(a). We further show front-view images retrieved based on neuron response in Figure 3(b).

## I Logic Program from Decision Trees

Here we show the corresponding logic program of the finite set of decision path  $\{r(\mathcal{P}_k^i)\}_{k=1}^{K^i}$  for every interpreted neuron in all network architectures. The symbols used in the logic program follow the state grounding definition in Section E. We also briefly summarize the size of associated decision trees by computing the number of decision rules for each model (before logic program reduction and conflict checking).

Table 15: Robustness to hyperparameters for *Logic Conflict*. The results are averaged across 5 random seeds in classical control (Pendulum).

| [Logic Conflict ↓]<br>Network Architecture |       | FCs    | GRU    | LSTM   | ODE-RNN | CfC           | NCP    |
|--------------------------------------------|-------|--------|--------|--------|---------|---------------|--------|
| Cost Complexity Pruning                    | 0.001 | 0.2451 | 0.3348 | 0.5240 | 0.2641  | <b>0.2048</b> | 0.3159 |
|                                            | 0.003 | 0.2104 | 0.2832 | 0.5072 | 0.2506  | <b>0.1556</b> | 0.2026 |
|                                            | 0.01  | 0.1766 | 0.1877 | 0.4325 | 0.1401  | <b>0.1121</b> | 0.2924 |
| Minimal Leaf Sample Ratio                  | 0.01  | 0.2672 | 0.4298 | 0.6791 | 0.3575  | <b>0.2654</b> | 0.2607 |
|                                            | 0.1   | 0.2104 | 0.2832 | 0.5072 | 0.2506  | <b>0.1556</b> | 0.2026 |
|                                            | 0.2   | 0.1796 | 0.1664 | 0.3842 | 0.2001  | <b>0.1089</b> | 0.1111 |

Table 16: Removing a single neuron based on explanation.

| Remove Neuron | 0    | 1    | 2    | 3    | 4     | 5    | 6    | 7    |
|---------------|------|------|------|------|-------|------|------|------|
| Performance ↑ | 0.24 | 0.07 | 0.09 | 1.00 | 0.969 | 0.29 | 0.03 | 1.00 |

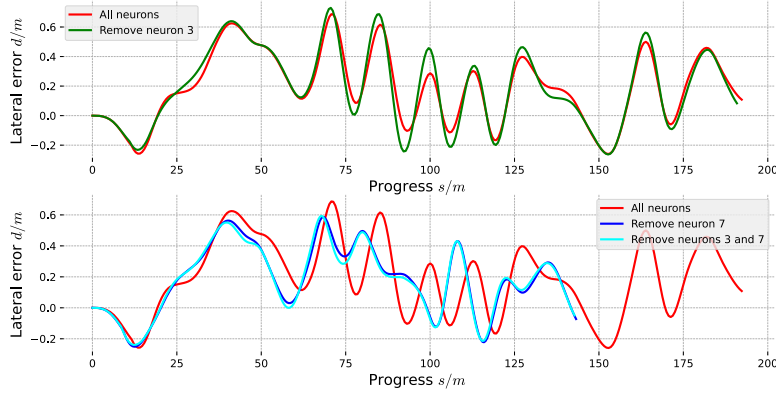

Figure 4: Driving profile when removing neurons according to decision tree interpretation.

731 In classical control (Pendulum), the extracted logic program are shown in Table 17 (FC; of size 39),  
732 Table 18 (GRU; of size 54), Table 19 (LSTM; of size 43), Table 20 (ODE-RNN; of size 40), Table 21  
733 (CfC; of size 20), Table 22 (NCP; of size 26).

734 In locomotion (HalfCheetah), the extracted logic program are shown in Table 23 (FC; of size 171),  
735 Table 24 (GRU; of size 158), Table 25 (LSTM; of size 148), Table 26 (ODE-RNN; of size 156),  
736 Table 27 (CfC; of size 149), Table 28 (NCP; of size 81).

737 In end-to-end visual servoing (Image-based Driving), the extracted logic program are shown in  
738 Table 29 (FC; of size 92), Table 30 (GRU; of size 60), Table 31 (LSTM; of size 70), Table 32  
739 (ODE-RNN; of size 94), Table 33 (CfC; of size 107), Table 34 (NCP; of size 66).

740 In a logic program, "conflict" indicates there are conflict between predicates within the logic pro-  
741 gram as elaborated in Section 3.2.

| Model | Neuron | Logic Program                                                                                                                                                                                                                                                                                                                             |
|-------|--------|-------------------------------------------------------------------------------------------------------------------------------------------------------------------------------------------------------------------------------------------------------------------------------------------------------------------------------------------|
| FC    | 0      | 0: $(\dot{\theta} \leq 0.69) \wedge (\theta \leq -2.18)$<br>1: $(\dot{\theta} > 0.69) \wedge (\theta \leq -2.18)$<br>2: (conflict)<br>3: $(\theta \leq 2.41) \wedge (\theta > -2.18)$<br>4: $(\theta > 2.41)$                                                                                                                             |
|       | 1      | 0: $(\dot{\theta} \leq -1.16) \wedge (\theta \leq -0.34)$<br>1: $(\dot{\theta} \leq 1.73) \wedge (\dot{\theta} > -1.16) \wedge (\theta \leq -0.34)$<br>2: $(\dot{\theta} > 1.73) \wedge (\theta \leq -0.34)$<br>3: $(\theta \leq 2.03) \wedge (\theta > -0.34)$<br>4: $(\theta \leq 2.62) \wedge (\theta > 2.03)$<br>5: $(\theta > 2.62)$ |
|       | 2      | 0: $(\dot{\theta} \leq -1.54) \wedge (\theta \leq -1.68)$<br>1: $(\dot{\theta} \leq 1.47) \wedge (\dot{\theta} > -1.54) \wedge (\theta \leq -1.68)$<br>2: $(\dot{\theta} > 1.47) \wedge (\theta \leq -1.68)$<br>3: (conflict)<br>4: $(\theta \leq 2.48) \wedge (\theta > -1.68)$<br>5: $(\theta > 2.48)$                                  |
|       | 3      | 0: $(\theta \leq -2.76)$<br>1: (conflict)<br>2: $(\theta \leq 0.05) \wedge (\theta > -2.76)$<br>3: $(\theta > 0.05)$                                                                                                                                                                                                                      |

Table 17: Logic program of FC in classical control (Pendulum).

| Model | Neuron | Logic Program                                                                                                                                                                                                                                                                                                                                                                                                                                        |
|-------|--------|------------------------------------------------------------------------------------------------------------------------------------------------------------------------------------------------------------------------------------------------------------------------------------------------------------------------------------------------------------------------------------------------------------------------------------------------------|
| GRU   | 0      | 0: $(\theta \leq -0.06)$<br>1: (conflict)<br>2: $(\dot{\theta} \leq -0.30) \wedge (\theta > -0.06)$<br>3: $(\dot{\theta} \leq 1.75) \wedge (\dot{\theta} > -0.30) \wedge (\theta > -0.06)$<br>4: $(\dot{\theta} > 1.75) \wedge (\theta > -0.06)$                                                                                                                                                                                                     |
|       | 1      | 0: $(\dot{\theta} \leq -2.30) \wedge (\theta \leq -1.27)$<br>1: $(\dot{\theta} \leq 1.83) \wedge (\dot{\theta} > -2.30) \wedge (\theta \leq -1.27)$<br>2: $(\dot{\theta} \leq -0.37) \wedge (\theta > -1.27)$<br>3: $(\dot{\theta} \leq 1.83) \wedge (\dot{\theta} > -0.37) \wedge (\theta > -1.27)$<br>4: $(\dot{\theta} \leq 3.10) \wedge (\dot{\theta} > 1.83)$<br>5: $(\dot{\theta} > 3.10)$                                                     |
|       | 2      | 0: $(\dot{\theta} \leq -0.11) \wedge (\theta \leq -0.05)$<br>1: $(\dot{\theta} \leq -0.11) \wedge (\theta > -0.05)$<br>2: (conflict) $\wedge (\theta > -0.05)$<br>3: $(\dot{\theta} > -0.11) \wedge (\theta \leq -2.09)$<br>4: $(\dot{\theta} > -0.11) \wedge (\theta \leq 0.41) \wedge (\theta > -2.09)$<br>5: $(\dot{\theta} \leq 1.61) \wedge (\dot{\theta} > -0.11) \wedge (\theta > 0.41)$<br>6: $(\dot{\theta} > 1.61) \wedge (\theta > 0.41)$ |
|       | 3      | 0: $(\theta \leq -2.61)$<br>1: $(\dot{\theta} \leq 2.44) \wedge (\theta \leq 0.21) \wedge (\theta > -2.61)$<br>2: $(\dot{\theta} > 2.44) \wedge (\theta \leq 0.21) \wedge (\theta > -2.61)$<br>3: $(\dot{\theta} \leq -1.76) \wedge (\theta > 0.21)$<br>4: $(\dot{\theta} \leq 0.39) \wedge (\dot{\theta} > -1.76) \wedge (\theta > 0.21)$<br>5: $(\dot{\theta} > 0.39) \wedge (\theta > 0.21)$                                                      |

Table 18: Logic program of GRU in classical control (Pendulum).

| Model | Neuron | Logic Program                                                                                                                                                                                                                                                                                                            |
|-------|--------|--------------------------------------------------------------------------------------------------------------------------------------------------------------------------------------------------------------------------------------------------------------------------------------------------------------------------|
| LSTM  | 0      | 0: $(\theta \leq -2.16)$<br>1: (conflict)<br>2: $(\theta \leq 0.01) \wedge (\theta > -2.16)$<br>3: $(\dot{\theta} \leq 0.48) \wedge (\theta > 0.01)$<br>4: $(\dot{\theta} \leq 3.00) \wedge (\dot{\theta} > 0.48) \wedge (\theta > 0.01)$<br>5: $(\dot{\theta} > 3.00) \wedge (\theta > 0.01)$                           |
|       | 1      | 0: $(\dot{\theta} \leq -2.57)$<br>1: (conflict)<br>2: $(\dot{\theta} > -2.57) \wedge (\theta \leq 0.35)$<br>3: $(\dot{\theta} > -2.57) \wedge (\theta \leq 2.03) \wedge (\theta > 0.35)$<br>4: $(\dot{\theta} > -2.57) \wedge (\theta > 2.03)$                                                                           |
|       | 2      | 0: $(\dot{\theta} \leq 4.79) \wedge (\theta \leq -2.31)$<br>1: $(\dot{\theta} \leq 4.79) \wedge (\theta \leq 1.72) \wedge (\theta > -2.31)$<br>2: $(\dot{\theta} \leq -3.13) \wedge (\theta > 1.72)$<br>3: $(\dot{\theta} \leq 4.79) \wedge (\dot{\theta} > -3.13) \wedge (\theta > 1.72)$<br>4: $(\dot{\theta} > 4.79)$ |
|       | 3      | 0: $(\theta \leq -2.32)$<br>1: $(\theta \leq 0.93) \wedge (\theta > -2.32)$<br>2: $(\dot{\theta} \leq -3.98) \wedge (\theta > 0.93)$<br>3: $(\dot{\theta} > -3.98) \wedge (\theta \leq 2.04) \wedge (\theta > 0.93)$<br>4: $(\dot{\theta} > -3.98) \wedge (\theta > 2.04)$                                               |

Table 19: Logic program of LSTM in classical control (Pendulum).

| Model   | Neuron | Logic Program                                                                                                                                                                                                                                                                                                                                                                                                                |
|---------|--------|------------------------------------------------------------------------------------------------------------------------------------------------------------------------------------------------------------------------------------------------------------------------------------------------------------------------------------------------------------------------------------------------------------------------------|
| ODE-RNN | 0      | 0: $(\dot{\theta} \leq -1.48) \wedge (\theta \leq -0.02)$<br>1: $(\dot{\theta} \leq -1.48) \wedge (\theta > -0.02)$<br>2: $(\dot{\theta} > -1.48)$                                                                                                                                                                                                                                                                           |
|         | 1      | 0: $(\dot{\theta} \leq -0.08) \wedge (\theta \leq -1.45)$<br>1: $(\dot{\theta} > -0.08) \wedge (\theta \leq -1.45)$<br>2: $(\theta \leq 2.05) \wedge (\theta > -1.45)$<br>3: $(\theta \leq 2.50) \wedge (\theta > 2.05)$<br>4: $(\dot{\theta} \leq -0.40) \wedge (\theta > 2.50)$<br>5: $(\dot{\theta} \leq 0.03) \wedge (\dot{\theta} > -0.40) \wedge (\theta > 2.50)$<br>6: $(\dot{\theta} > 0.03) \wedge (\theta > 2.50)$ |
|         | 2      | 0: $(\dot{\theta} \leq -0.56)$<br>1: $(\dot{\theta} > -0.56) \wedge (\theta \leq -2.16)$<br>2: $(\dot{\theta} > -0.56) \wedge (\theta \leq 2.44) \wedge (\theta > -2.16)$<br>3: (conflict) $\wedge (\theta > 2.44)$<br>4: $(\dot{\theta} > -0.56) \wedge (\theta > 2.44)$                                                                                                                                                    |
|         | 3      | 0: $(\theta \leq -2.18)$<br>1: $(\theta \leq 0.04) \wedge (\theta > -2.18)$<br>2: $(\theta \leq 2.65) \wedge (\theta > 0.04)$<br>3: $(\dot{\theta} \leq -0.21) \wedge (\theta > 2.65)$<br>4: $(\dot{\theta} > -0.21) \wedge (\theta > 2.65)$                                                                                                                                                                                 |

Table 20: Logic program of ODE-RNN in classical control (Pendulum).

| Model | Neuron | Logic Program                                                                                                                                         |
|-------|--------|-------------------------------------------------------------------------------------------------------------------------------------------------------|
| CfC   | 0      | 0: $(\theta \leq -0.03)$<br>1: (conflict)<br>2: (conflict)<br>3: $(\theta > -0.03)$                                                                   |
|       | 1      | 0: $(\theta \leq -0.05)$<br>1: (conflict)<br>2: (conflict)<br>3: $(\theta > -0.05)$                                                                   |
|       | 2      | 0: $(\theta \leq -2.02)$<br>1: $(\theta > -2.02)$                                                                                                     |
|       | 3      | 0: $(\theta \leq -0.12)$<br>1: $(\theta \leq 0.24) \wedge (\theta > -0.12)$<br>2: $(\theta \leq 2.14) \wedge (\theta > 0.24)$<br>3: $(\theta > 2.14)$ |

Table 21: Logic program of CfC in classical control (Pendulum).

| Model | Neuron | Logic Program                                                                                                                                                                                                                                                                               |
|-------|--------|---------------------------------------------------------------------------------------------------------------------------------------------------------------------------------------------------------------------------------------------------------------------------------------------|
| NCP   | 0      | 0: $(\dot{\theta} \leq 0.33)$<br>1: $(\dot{\theta} > 0.33)$                                                                                                                                                                                                                                 |
|       | 1      | 0: $(\theta \leq -0.07)$<br>1: (conflict)<br>2: $(\dot{\theta} \leq 0.27) \wedge (\theta > -0.07)$<br>3: $(\theta > 0.27)$                                                                                                                                                                  |
|       | 2      | 0: $(\dot{\theta} \leq 4.80) \wedge (\theta \leq -1.27)$<br>1: $(\dot{\theta} \leq 4.80) \wedge (\theta \leq 1.66) \wedge (\theta > -1.27)$<br>2: $(\dot{\theta} \leq 4.80) \wedge (\theta > 1.66)$<br>3: $(\dot{\theta} > 4.80)$                                                           |
|       | 3      | 0: $(\dot{\theta} \leq -0.33)$<br>1: $(\dot{\theta} \leq 0.44) \wedge (\dot{\theta} > -0.33)$<br>2: $(\dot{\theta} > 0.44) \wedge (\theta \leq -1.31)$<br>3: $(\dot{\theta} > 0.44) \wedge (\theta \leq 1.44) \wedge (\theta > -1.31)$<br>4: $(\dot{\theta} > 0.44) \wedge (\theta > 1.44)$ |

Table 22: Logic program of NCP in classical control (Pendulum).

| Model | Neuron | Logic Program                                                                                                                                                                                                                                                                                                                                                                                                                                                                                                                                                                                                                                                                                                                                                                                                                                                              |
|-------|--------|----------------------------------------------------------------------------------------------------------------------------------------------------------------------------------------------------------------------------------------------------------------------------------------------------------------------------------------------------------------------------------------------------------------------------------------------------------------------------------------------------------------------------------------------------------------------------------------------------------------------------------------------------------------------------------------------------------------------------------------------------------------------------------------------------------------------------------------------------------------------------|
| FC    | 0      | 0: ( $\dot{\theta}_R \leq -0.22$ ) $\wedge$ ( $\dot{\theta}_{T,F} \leq -3.26$ )<br>1: ( $\dot{\theta}_R > -0.22$ ) $\wedge$ ( $\dot{\theta}_{T,F} \leq -3.26$ )<br>2: ( $\dot{\theta}_{T,F} \leq 6.46$ ) $\wedge$ ( $\dot{\theta}_{T,F} > -3.26$ ) $\wedge$ ( $\theta_{F,F} \leq -0.50$ )<br>3: ( $\dot{\theta}_{T,F} \leq 6.46$ ) $\wedge$ ( $\dot{\theta}_{T,F} > -3.26$ ) $\wedge$ ( $\theta_{F,F} > -0.50$ )<br>4: ( $\dot{\theta}_{T,F} > 6.46$ ) $\wedge$ ( $h_R \leq 0.05$ )<br>5: ( $\dot{\theta}_{T,F} > 6.46$ ) $\wedge$ ( $h_R > 0.05$ )                                                                                                                                                                                                                                                                                                                        |
|       | 1      | 0: ( $\theta_{F,B} \leq -0.05$ ) $\wedge$ ( $\theta_{S,F} \leq 0.61$ ) $\wedge$ ( $\theta_{T,B} \leq 0.05$ )<br>1: ( $\theta_{F,B} \leq -0.05$ ) $\wedge$ ( $\theta_{S,F} > 0.61$ ) $\wedge$ ( $\theta_{T,B} \leq 0.05$ )<br>2: ( $\dot{\theta}_{T,F} \leq -11.24$ ) $\wedge$ ( $\theta_{F,B} > -0.05$ ) $\wedge$ ( $\theta_{T,B} \leq 0.05$ )<br>3: ( $\dot{\theta}_{T,F} > -11.24$ ) $\wedge$ ( $\theta_{F,B} > -0.05$ ) $\wedge$ ( $\theta_{T,B} \leq 0.05$ )<br>4: ( $\theta_{T,B} > 0.05$ ) $\wedge$ ( $\theta_{T,F} \leq 0.40$ )<br>5: ( $\theta_{T,B} > 0.05$ ) $\wedge$ ( $\theta_{T,F} \leq 0.62$ ) $\wedge$ ( $\theta_{T,F} > 0.40$ )<br>6: ( $\dot{\theta}_{T,B} \leq 2.08$ ) $\wedge$ ( $\theta_{T,B} > 0.05$ ) $\wedge$ ( $\theta_{T,F} > 0.62$ )<br>7: ( $\dot{\theta}_{T,B} > 2.08$ ) $\wedge$ ( $\theta_{T,B} > 0.05$ ) $\wedge$ ( $\theta_{T,F} > 0.62$ ) |
|       | 2      | 0: ( $\dot{\theta}_{F,F} \leq -12.45$ ) $\wedge$ ( $\theta_{F,B} \leq 0.06$ )<br>1: ( $\dot{\theta}_{F,F} > -12.45$ ) $\wedge$ ( $\theta_{F,B} \leq 0.06$ ) $\wedge$ ( $\theta_{S,F} \leq 0.65$ )<br>2: ( $\dot{\theta}_{F,F} > -12.45$ ) $\wedge$ ( $\theta_{F,B} \leq 0.06$ ) $\wedge$ ( $\theta_{S,F} > 0.65$ )<br>3: ( $\dot{\theta}_{T,B} \leq 6.33$ ) $\wedge$ ( $\theta_{F,B} > 0.06$ ) $\wedge$ ( $\theta_{T,F} \leq 0.33$ )<br>4: ( $\dot{\theta}_{T,B} \leq 6.33$ ) $\wedge$ ( $\theta_{F,B} > 0.06$ ) $\wedge$ ( $\theta_{T,F} > 0.33$ )<br>5: ( $\dot{\theta}_{T,B} > 6.33$ ) $\wedge$ ( $\theta_{F,B} > 0.06$ )                                                                                                                                                                                                                                               |
|       | 3      | 0: ( $\theta_{F,B} \leq 0.38$ ) $\wedge$ ( $\theta_{S,F} \leq 0.17$ ) $\wedge$ ( $\theta_{T,F} \leq 0.58$ )<br>1: ( $\theta_{F,B} \leq 0.38$ ) $\wedge$ ( $\theta_{S,F} \leq 0.17$ ) $\wedge$ ( $\theta_{T,F} > 0.58$ )<br>2: ( $\theta_{F,B} \leq 0.38$ ) $\wedge$ ( $\theta_{S,F} > 0.17$ ) $\wedge$ ( $\theta_{T,B} \leq 0.07$ )<br>3: ( $\theta_{F,B} \leq 0.38$ ) $\wedge$ ( $\theta_{S,F} > 0.17$ ) $\wedge$ ( $\theta_{T,B} > 0.07$ )<br>4: ( $\theta_{F,B} > 0.38$ )                                                                                                                                                                                                                                                                                                                                                                                               |
|       | 4      | 0: ( $\dot{\theta}_{S,B} \leq 1.79$ ) $\wedge$ ( $\theta_R \leq 0.19$ ) $\wedge$ ( $\theta_{T,B} \leq 0.06$ )<br>1: ( $\dot{\theta}_{S,B} > 1.79$ ) $\wedge$ ( $\theta_R \leq 0.19$ ) $\wedge$ ( $\theta_{T,B} \leq 0.06$ )<br>2: ( $\dot{\theta}_{F,F} \leq 9.07$ ) $\wedge$ ( $\theta_R > 0.19$ ) $\wedge$ ( $\theta_{T,B} \leq 0.06$ )<br>3: ( $\dot{\theta}_{F,F} > 9.07$ ) $\wedge$ ( $\theta_R > 0.19$ ) $\wedge$ ( $\theta_{T,B} \leq 0.06$ )<br>4: ( $\theta_R \leq -0.03$ ) $\wedge$ ( $\theta_{T,B} > 0.06$ )<br>5: ( $\theta_R > -0.03$ ) $\wedge$ ( $\theta_{F,F} \leq -0.49$ ) $\wedge$ ( $\theta_{T,B} > 0.06$ )<br>6: ( $\theta_R > -0.03$ ) $\wedge$ ( $\theta_{F,F} > -0.49$ ) $\wedge$ ( $\theta_{T,B} > 0.06$ )                                                                                                                                         |
|       | 5      | 0: ( $\dot{\theta}_{T,B} \leq 1.10$ ) $\wedge$ ( $\dot{\theta}_{T,F} \leq -6.72$ ) $\wedge$ ( $\theta_{T,F} \leq 0.67$ )<br>1: ( $\dot{\theta}_{T,B} \leq 1.10$ ) $\wedge$ ( $\dot{\theta}_{T,F} > -6.72$ ) $\wedge$ ( $\theta_{T,F} \leq 0.67$ )<br>2: ( $\dot{\theta}_{T,B} \leq 1.10$ ) $\wedge$ ( $\theta_{T,F} > 0.67$ )<br>3: ( $\dot{\theta}_{T,B} > 1.10$ ) $\wedge$ ( $h_R \leq -0.33$ ) $\wedge$ ( $\theta_R \leq 0.29$ )<br>4: ( $\dot{\theta}_{T,B} > 1.10$ ) $\wedge$ ( $h_R > -0.33$ ) $\wedge$ ( $\theta_R \leq 0.29$ )<br>5: ( $\dot{\theta}_{T,B} > 1.10$ ) $\wedge$ ( $h_R \leq -0.48$ ) $\wedge$ ( $\theta_R > 0.29$ )<br>6: ( $\dot{\theta}_{T,B} > 1.10$ ) $\wedge$ ( $h_R > -0.48$ ) $\wedge$ ( $\theta_R > 0.29$ )                                                                                                                                  |
|       | 6      | 0: ( $\dot{\theta}_R \leq -0.83$ ) $\wedge$ ( $\dot{\theta}_{F,B} \leq 4.65$ ) $\wedge$ ( $\dot{\theta}_{F,F} \leq -0.07$ )<br>1: ( $\dot{\theta}_R \leq -0.83$ ) $\wedge$ ( $\dot{\theta}_{F,B} > 4.65$ ) $\wedge$ ( $\dot{\theta}_{F,F} \leq -0.07$ )<br>2: ( $\dot{\theta}_R > -0.83$ ) $\wedge$ ( $\dot{\theta}_{F,F} \leq -0.07$ ) $\wedge$ ( $\theta_{S,B} \leq -0.33$ )<br>3: ( $\dot{\theta}_R > -0.83$ ) $\wedge$ ( $\dot{\theta}_{F,F} \leq -0.07$ ) $\wedge$ ( $\theta_{S,B} > -0.33$ )<br>4: ( $\dot{\theta}_{F,F} > -0.07$ ) $\wedge$ ( $\theta_R \leq 0.52$ )<br>5: ( $\dot{\theta}_{F,F} > -0.07$ ) $\wedge$ ( $\theta_R > 0.52$ )                                                                                                                                                                                                                          |
|       | 7      | 0: ( $\dot{\theta}_{T,F} \leq -0.36$ ) $\wedge$ ( $\theta_R \leq 0.33$ ) $\wedge$ ( $\theta_{S,F} \leq 0.56$ )<br>1: ( $\dot{\theta}_{T,F} \leq -0.36$ ) $\wedge$ ( $\theta_R > 0.33$ ) $\wedge$ ( $\theta_{S,F} \leq 0.56$ )<br>2: ( $\dot{\theta}_{T,F} \leq -0.36$ ) $\wedge$ ( $\theta_{S,F} > 0.56$ )<br>3: ( $\dot{\theta}_{T,F} \leq 6.91$ ) $\wedge$ ( $\dot{\theta}_{T,F} > -0.36$ ) $\wedge$ ( $\theta_{S,B} \leq 0.09$ )<br>4: ( $\dot{\theta}_{T,F} > 6.91$ ) $\wedge$ ( $\theta_{S,B} \leq 0.09$ )<br>5: ( $\dot{\theta}_{T,F} > -0.36$ ) $\wedge$ ( $\theta_{S,B} > 0.09$ )                                                                                                                                                                                                                                                                                  |
|       | 8      | 0: ( $\dot{\theta}_R \leq -0.10$ ) $\wedge$ ( $\dot{\theta}_{T,B} \leq -3.31$ )<br>1: ( $\dot{\theta}_R > -0.10$ ) $\wedge$ ( $\dot{\theta}_{T,B} \leq -3.31$ )<br>2: ( $\dot{\theta}_{T,B} \leq 0.97$ ) $\wedge$ ( $\theta_{T,B} > -3.31$ )<br>3: ( $\dot{\theta}_{T,B} > 0.97$ ) $\wedge$ ( $\theta_{S,B} \leq -0.35$ )<br>4: ( $\dot{\theta}_{T,B} > 0.97$ ) $\wedge$ ( $\theta_R \leq 0.20$ ) $\wedge$ ( $\theta_{S,B} > -0.35$ )<br>5: ( $\dot{\theta}_{T,B} > 0.97$ ) $\wedge$ ( $\theta_R > 0.20$ ) $\wedge$ ( $\theta_{S,B} > -0.35$ )                                                                                                                                                                                                                                                                                                                             |
|       | 9      | 0: ( $\dot{\theta}_{F,B} \leq 0.63$ ) $\wedge$ ( $\dot{\theta}_{S,F} \leq 3.07$ )<br>1: ( $\dot{\theta}_{F,B} \leq 0.63$ ) $\wedge$ ( $\dot{\theta}_{S,F} > 3.07$ ) $\wedge$ ( $\theta_R \leq 0.46$ )<br>2: ( $\dot{\theta}_{F,B} \leq 0.63$ ) $\wedge$ ( $\dot{\theta}_{S,F} > 3.07$ ) $\wedge$ ( $\theta_R > 0.46$ )<br>3: ( $\dot{\theta}_{F,B} > 0.63$ ) $\wedge$ ( $\theta_{T,F} \leq 5.96$ ) $\wedge$ ( $h_R \leq 0.03$ )<br>4: ( $\dot{\theta}_{F,B} > 0.63$ ) $\wedge$ ( $\theta_{T,F} \leq 5.96$ ) $\wedge$ ( $h_R > 0.03$ )<br>5: ( $\dot{\theta}_{F,B} > 0.63$ ) $\wedge$ ( $\dot{\theta}_{T,F} > 5.96$ ) $\wedge$ ( $\theta_{T,F} \leq 0.38$ )<br>6: ( $\dot{\theta}_{F,B} > 0.63$ ) $\wedge$ ( $\dot{\theta}_{T,F} > 5.96$ ) $\wedge$ ( $\theta_{T,F} > 0.38$ )                                                                                               |

Table 23: Logic program of FC in locomotion (HalfCheetah).

| Model | Neuron | Logic Program                                                                                                                                                                                                                                                                                                                                                                                                                                                                                                                                                                                                          |
|-------|--------|------------------------------------------------------------------------------------------------------------------------------------------------------------------------------------------------------------------------------------------------------------------------------------------------------------------------------------------------------------------------------------------------------------------------------------------------------------------------------------------------------------------------------------------------------------------------------------------------------------------------|
| GRU   | 0      | 0: $(\dot{\theta}_R \leq 1.54) \wedge (\dot{\theta}_{T,B} \leq -2.33) \wedge (\theta_R \leq 0.52)$<br>1: $(\dot{\theta}_R > 1.54) \wedge (\dot{\theta}_{T,B} \leq -2.33) \wedge (\theta_R \leq 0.52)$<br>2: $(\dot{\theta}_{T,B} > -2.33) \wedge (\theta_R \leq 0.11)$<br>3: $(\dot{\theta}_{T,B} > -2.33) \wedge (\theta_R \leq 0.52) \wedge (\theta_R > 0.11)$<br>4: $(\dot{\theta}_{T,F} \leq -7.48) \wedge (\theta_R > 0.52)$<br>5: $(\dot{\theta}_{T,F} > -7.48) \wedge (\theta_R \leq 0.97) \wedge (\theta_R > 0.52)$<br>6: $(\dot{\theta}_{T,F} > -7.48) \wedge (\theta_R > 0.97)$                              |
|       | 1      | 0: $(\dot{\theta}_{S,B} \leq 10.33) \wedge (\theta_R \leq 0.50) \wedge (\theta_{F,B} \leq -0.41)$<br>1: $(\dot{\theta}_{S,B} \leq 10.33) \wedge (\theta_R \leq 0.50) \wedge (\theta_{F,B} > -0.41)$<br>2: $(\dot{\theta}_{S,B} \leq 10.33) \wedge (\dot{h}_R \leq -0.07) \wedge (\theta_R > 0.50)$<br>3: $(\dot{\theta}_{S,B} \leq 10.33) \wedge (\dot{h}_R > -0.07) \wedge (\theta_R > 0.50)$<br>4: $(\dot{\theta}_{S,B} > 10.33)$                                                                                                                                                                                    |
|       | 2      | 0: $(\dot{\theta}_{T,B} \leq 3.33) \wedge (\theta_R \leq 0.12)$<br>1: $(\dot{\theta}_{T,B} > 3.33) \wedge (\theta_R \leq 0.12)$<br>2: $(\dot{\theta}_{T,B} \leq 6.59) \wedge (\theta_R > 0.12) \wedge (\theta_{T,F} \leq 0.70)$<br>3: $(\dot{\theta}_{T,B} \leq 6.59) \wedge (\theta_R > 0.12) \wedge (\theta_{T,F} > 0.70)$<br>4: $(\dot{\theta}_{T,B} > 6.59) \wedge (\theta_R \leq 0.54) \wedge (\theta_R > 0.12)$<br>5: $(\dot{\theta}_{T,B} > 6.59) \wedge (\theta_R > 0.54)$                                                                                                                                     |
|       | 3      | 0: $(\dot{\theta}_R \leq -0.78) \wedge (\theta_{T,F} \leq 0.17)$<br>1: $(\dot{\theta}_R > -0.78) \wedge (\theta_R \leq 0.68) \wedge (\theta_{T,F} \leq 0.17)$<br>2: $(\dot{\theta}_R > -0.78) \wedge (\theta_R > 0.68) \wedge (\theta_{T,F} \leq 0.17)$<br>3: $(\dot{h}_R \leq 0.64) \wedge (\theta_{T,B} \leq -0.14) \wedge (\theta_{T,F} > 0.17)$<br>4: $(\dot{h}_R \leq 0.64) \wedge (\theta_{T,B} > -0.14) \wedge (\theta_{T,F} > 0.17)$<br>5: $(\dot{h}_R > 0.64) \wedge (\theta_{T,F} > 0.17)$                                                                                                                   |
|       | 4      | 0: $(\dot{\theta}_{S,B} \leq 1.92) \wedge (\theta_{S,F} \leq 0.02)$<br>1: $(\dot{\theta}_{S,B} > 1.92) \wedge (\theta_{S,F} \leq 0.02)$<br>2: $(\dot{\theta}_{S,B} \leq 6.10) \wedge (\dot{\theta}_{S,F} \leq 7.21) \wedge (\theta_{S,F} > 0.02)$<br>3: $(\dot{\theta}_{S,B} \leq 6.10) \wedge (\dot{\theta}_{S,F} > 7.21) \wedge (\theta_{S,F} > 0.02)$<br>4: $(\dot{\theta}_{S,B} > 6.10) \wedge (\theta_{S,F} > 0.02)$                                                                                                                                                                                              |
|       | 5      | 0: $(\dot{\theta}_{T,B} \leq 2.59) \wedge (\theta_{F,B} \leq 0.10) \wedge (\theta_{T,B} \leq -0.16)$<br>1: $(\dot{\theta}_{T,B} \leq 2.59) \wedge (\theta_{F,B} \leq 0.10) \wedge (\theta_{T,B} > -0.16)$<br>2: $(\dot{\theta}_{T,B} > 2.59) \wedge (\theta_{F,B} \leq 0.10)$<br>3: $(\dot{\theta}_{T,B} \leq 1.45) \wedge (\dot{\theta}_{T,F} \leq 6.43) \wedge (\theta_{F,B} > 0.10)$<br>4: $(\dot{\theta}_{T,B} > 1.45) \wedge (\dot{\theta}_{T,F} \leq 6.43) \wedge (\theta_{F,B} > 0.10)$<br>5: $(\text{conflict}) \wedge (\theta_{F,B} > 0.10)$<br>6: $(\dot{\theta}_{T,F} > 6.43) \wedge (\theta_{F,B} > 0.10)$ |
|       | 6      | 0: $(\theta_R \leq 0.17) \wedge (\theta_{F,B} \leq -0.12)$<br>1: $(\theta_R \leq 0.62) \wedge (\theta_R > 0.17) \wedge (\theta_{F,B} \leq -0.12)$<br>2: $(\dot{\theta}_{F,B} \leq 6.66) \wedge (\theta_R \leq 0.62) \wedge (\theta_{F,B} > -0.12)$<br>3: $(\dot{\theta}_{F,B} > 6.66) \wedge (\theta_R \leq 0.62) \wedge (\theta_{F,B} > -0.12)$<br>4: $(\dot{\theta}_{T,B} \leq -5.47) \wedge (\theta_R > 0.62)$<br>5: $(\dot{\theta}_{T,B} > -5.47) \wedge (\theta_R \leq 0.89) \wedge (\theta_R > 0.62)$<br>6: $(\dot{\theta}_{T,B} > -5.47) \wedge (\theta_R > 0.89)$                                              |
|       | 7      | 0: $(\dot{h}_R \leq -0.27) \wedge (\theta_{T,F} \leq 0.20)$<br>1: $(\dot{\theta}_{T,B} \leq -0.25) \wedge (\dot{h}_R > -0.27) \wedge (\theta_{T,F} \leq 0.20)$<br>2: $(\dot{\theta}_{T,B} > -0.25) \wedge (\dot{h}_R > -0.27) \wedge (\theta_{T,F} \leq 0.20)$<br>3: $(\dot{h}_R \leq 0.12) \wedge (\theta_R \leq 0.77) \wedge (\theta_{T,F} > 0.20)$<br>4: $(\dot{h}_R \leq 0.12) \wedge (\theta_R > 0.77) \wedge (\theta_{T,F} > 0.20)$<br>5: $(\dot{h}_R > 0.12) \wedge (\theta_{T,F} > 0.20)$                                                                                                                      |
|       | 8      | 0: $(\dot{h}_R \leq 0.13) \wedge (\theta_{F,B} \leq -0.16) \wedge (\dot{h}_R \leq 0.07)$<br>1: $(\dot{h}_R \leq 0.13) \wedge (\theta_{F,B} > -0.16) \wedge (\dot{h}_R \leq 0.07)$<br>2: $(\dot{h}_R \leq 0.13) \wedge (\dot{h}_R > 0.07)$<br>3: $(\dot{h}_R \leq 1.11) \wedge (\dot{h}_R > 0.13) \wedge (\dot{h}_R \leq 0.08)$<br>4: $(\dot{h}_R > 1.11) \wedge (\dot{h}_R \leq 0.08)$<br>5: $(\dot{h}_R > 0.13) \wedge (\dot{h}_R > 0.08)$                                                                                                                                                                            |
|       | 9      | 0: $(\dot{\theta}_{T,F} \leq 0.51) \wedge (\theta_{S,F} \leq -0.07)$<br>1: $(\dot{\theta}_{F,F} \leq 3.81) \wedge (\dot{\theta}_{T,F} \leq 0.51) \wedge (\theta_{S,F} > -0.07)$<br>2: $(\dot{\theta}_{F,F} > 3.81) \wedge (\dot{\theta}_{T,F} \leq 0.51) \wedge (\theta_{S,F} > -0.07)$<br>3: $(\dot{\theta}_{T,F} > 0.51) \wedge (\theta_{F,B} \leq 0.34)$<br>4: $(\dot{\theta}_R \leq -1.78) \wedge (\theta_{T,F} > 0.51) \wedge (\theta_{F,B} > 0.34)$<br>5: $(\dot{\theta}_R > -1.78) \wedge (\theta_{T,F} > 0.51) \wedge (\theta_{F,B} > 0.34)$                                                                   |

Table 24: Logic program of GRU in locomotion (HalfCheetah).



| Model | Neuron | Logic Program                                                                                                                                                                                                                                                                                                                                                                                                                                                                                                                                                                         |
|-------|--------|---------------------------------------------------------------------------------------------------------------------------------------------------------------------------------------------------------------------------------------------------------------------------------------------------------------------------------------------------------------------------------------------------------------------------------------------------------------------------------------------------------------------------------------------------------------------------------------|
| LSTM  | 0      | $0: (\dot{\theta}_R \leq 2.01) \wedge (\theta_{S,B} \leq 0.53) \wedge (\theta_{T,F} \leq -0.28)$<br>$1: (\dot{\theta}_R \leq 2.01) \wedge (\theta_{S,B} \leq 0.53) \wedge (\theta_{T,F} > -0.28)$<br>$2: (\dot{\theta}_R > 2.01) \wedge (\theta_{S,B} \leq 0.53)$<br>$3: (\theta_{S,B} > 0.53)$                                                                                                                                                                                                                                                                                       |
|       | 1      | $0: (\theta_{F,F} \leq 0.02) \wedge (\theta_{T,F} \leq -0.35)$<br>$1: (\dot{\theta}_{F,F} \leq 1.23) \wedge (\theta_{F,F} \leq 0.02) \wedge (\theta_{T,F} > -0.35)$<br>$2: (\dot{\theta}_{F,F} > 1.23) \wedge (\theta_{F,F} \leq 0.02) \wedge (\theta_{T,F} > -0.35)$<br>$3: (\theta_{F,F} > 0.02) \wedge (\theta_{T,F} \leq -0.07)$<br>$4: (\dot{\theta}_{F,F} \leq 0.95) \wedge (\theta_{F,F} > 0.02) \wedge (\theta_{T,F} > -0.07)$<br>$5: (\dot{\theta}_{F,F} > 0.95) \wedge (\theta_{F,F} > 0.02) \wedge (\theta_{T,F} > -0.07)$                                                 |
|       | 2      | $0: (\theta_{F,F} \leq -0.46) \wedge (h_R \leq -0.07)$<br>$1: (\dot{\theta}_{F,B} \leq -4.76) \wedge (\theta_{F,F} > -0.46) \wedge (h_R \leq -0.07)$<br>$2: (\dot{\theta}_{F,B} > -4.76) \wedge (\theta_{F,F} > -0.46) \wedge (h_R \leq -0.07)$<br>$3: (\theta_R \leq 0.11) \wedge (h_R > -0.07)$<br>$4: (\theta_R > 0.11) \wedge (h_R > -0.07)$                                                                                                                                                                                                                                      |
|       | 3      | $0: (\dot{\theta}_{S,B} \leq 0.14) \wedge (\theta_{T,F} \leq -0.01) \wedge (h_R \leq -0.11)$<br>$1: (\dot{\theta}_{S,B} \leq 0.14) \wedge (\theta_{T,F} > -0.01) \wedge (h_R \leq -0.11)$<br>$2: (\dot{\theta}_{S,B} > 0.14) \wedge (\theta_{S,B} \leq 0.42) \wedge (h_R \leq -0.11)$<br>$3: (\dot{\theta}_{S,B} > 0.14) \wedge (\theta_{S,B} > 0.42) \wedge (h_R \leq -0.11)$<br>$4: (\theta_{T,B} \leq 0.27) \wedge (h_R > -0.11)$<br>$5: (\theta_{T,B} \leq 0.53) \wedge (\theta_{T,B} > 0.27) \wedge (h_R > -0.11)$<br>$6: (\theta_{T,B} > 0.53) \wedge (h_R > -0.11)$            |
|       | 4      | $0: (\theta_{F,F} \leq -0.00)$<br>$1: (\text{conflict})$<br>$2: (\theta_R \leq 0.12) \wedge (\theta_{F,F} \leq 0.39) \wedge (\theta_{F,F} > -0.00)$<br>$3: (\theta_R > 0.12) \wedge (\theta_{F,F} \leq 0.39) \wedge (\theta_{F,F} > -0.00)$<br>$4: (\dot{\theta}_R \leq -0.51) \wedge (\theta_{F,F} > 0.39)$<br>$5: (\dot{\theta}_R > -0.51) \wedge (\theta_{F,F} > 0.39)$                                                                                                                                                                                                            |
|       | 5      | $0: (\dot{\theta}_R \leq 0.07) \wedge (\theta_{F,F} \leq -0.05)$<br>$1: (\dot{\theta}_R \leq 0.07) \wedge (\theta_{F,F} \leq 0.35) \wedge (\theta_{F,F} > -0.05)$<br>$2: (\dot{\theta}_R > 0.07) \wedge (\theta_{F,F} \leq 0.35) \wedge (h_R \leq -0.18)$<br>$3: (\dot{\theta}_R > 0.07) \wedge (\theta_{F,F} \leq 0.35) \wedge (h_R > -0.18)$<br>$4: (\dot{\theta}_{S,B} \leq -2.15) \wedge (\theta_{F,F} > 0.35)$<br>$5: (\dot{\theta}_{S,B} > -2.15) \wedge (\theta_{F,F} > 0.35)$                                                                                                 |
|       | 6      | $0: (\dot{\theta}_{T,F} \leq 1.81) \wedge (h_R \leq -1.08) \wedge (\theta_{T,F} \leq -0.14)$<br>$1: (\dot{\theta}_{T,F} \leq 1.81) \wedge (h_R > -1.08) \wedge (\theta_{T,F} \leq -0.14)$<br>$2: (\dot{\theta}_{T,F} > 1.81) \wedge (\theta_{T,F} \leq -0.14)$<br>$3: (h_R \leq -0.47) \wedge (\theta_{T,F} > -0.14)$<br>$4: (\dot{\theta}_{T,B} \leq -1.89) \wedge (h_R > -0.47) \wedge (\theta_{T,F} > -0.14)$<br>$5: (\dot{\theta}_{T,B} > -1.89) \wedge (h_R > -0.47) \wedge (\theta_{T,F} > -0.14)$                                                                              |
|       | 7      | $0: (\theta_{F,F} \leq -0.07) \wedge (\theta_{T,F} \leq 0.36)$<br>$1: (\theta_{F,F} \leq -0.07) \wedge (\theta_{T,F} > 0.36)$<br>$2: (\dot{x}_R \leq 4.14) \wedge (\theta_{F,F} > -0.07) \wedge (\theta_{T,B} \leq 0.34)$<br>$3: (\dot{x}_R > 4.14) \wedge (\theta_{F,F} > -0.07) \wedge (\theta_{T,B} \leq 0.34)$<br>$4: (\theta_{T,F} \leq -2.37) \wedge (\theta_{F,F} > -0.07) \wedge (\theta_{T,B} > 0.34)$<br>$5: (\theta_{T,F} > -2.37) \wedge (\theta_{F,F} > -0.07) \wedge (\theta_{T,B} > 0.34)$                                                                             |
|       | 8      | $0: (\dot{\theta}_{F,B} \leq 11.09) \wedge (\dot{\theta}_{F,F} \leq 1.05) \wedge (\theta_{T,F} \leq -0.46)$<br>$1: (\dot{\theta}_{F,B} \leq 11.09) \wedge (\dot{\theta}_{F,F} \leq 1.05) \wedge (\theta_{T,F} > -0.46)$<br>$2: (\dot{\theta}_{F,B} > 11.09) \wedge (\dot{\theta}_{F,F} \leq 1.05)$<br>$3: (\dot{\theta}_{F,F} > 1.05) \wedge (\dot{\theta}_{T,B} \leq -11.38)$<br>$4: (\dot{\theta}_{F,F} > 1.05) \wedge (\dot{\theta}_{T,B} > -11.38) \wedge (\theta_R \leq 0.16)$<br>$5: (\dot{\theta}_{F,F} > 1.05) \wedge (\dot{\theta}_{T,B} > -11.38) \wedge (\theta_R > 0.16)$ |
|       | 9      | $0: (\theta_{F,F} \leq -0.40) \wedge (\theta_{S,B} \leq -0.33)$<br>$1: (\theta_{F,F} \leq -0.40) \wedge (\theta_{S,B} > -0.33)$<br>$2: (\dot{\theta}_{T,F} \leq -10.21) \wedge (h_R \leq -0.80) \wedge (\theta_{F,F} > -0.40)$<br>$3: (\dot{\theta}_{T,F} > -10.21) \wedge (h_R \leq -0.80) \wedge (\theta_{F,F} > -0.40)$<br>$4: (h_R > -0.80) \wedge (\theta_{F,B} \leq -0.14) \wedge (\theta_{F,F} > -0.40)$<br>$5: (h_R > -0.80) \wedge (\theta_{F,B} > -0.14) \wedge (\theta_{F,F} > -0.40)$                                                                                     |

Table 25: Logic program of LSTM in locomotion (HalfCheetah).

| Model   | Neuron | Logic Program                                                                                                                                                                                                                                                                                                                                                                                                                                                                                                                                                                                                                                                                                                                                            |
|---------|--------|----------------------------------------------------------------------------------------------------------------------------------------------------------------------------------------------------------------------------------------------------------------------------------------------------------------------------------------------------------------------------------------------------------------------------------------------------------------------------------------------------------------------------------------------------------------------------------------------------------------------------------------------------------------------------------------------------------------------------------------------------------|
| ODE-RNN | 0      | 0: ( $\dot{h}_R \leq -0.27$ ) $\wedge$ ( $\theta_{S,B} \leq -0.49$ )<br>1: ( $\dot{h}_R > -0.27$ ) $\wedge$ ( $\theta_{S,B} \leq -0.49$ )<br>2: ( $\dot{h}_R \leq -0.00$ ) $\wedge$ ( $\theta_{F,F} \leq -0.22$ ) $\wedge$ ( $\theta_{S,B} > -0.49$ )<br>3: ( $\dot{h}_R \leq -0.00$ ) $\wedge$ ( $\theta_{F,F} > -0.22$ ) $\wedge$ ( $\theta_{S,B} > -0.49$ )<br>4: ( $\dot{h}_R > -0.00$ ) $\wedge$ ( $\theta_{S,B} > -0.49$ ) $\wedge$ ( $\theta_{T,B} \leq 0.22$ )<br>5: ( $\dot{h}_R > -0.00$ ) $\wedge$ ( $\theta_{S,B} > -0.49$ ) $\wedge$ ( $\theta_{T,B} > 0.22$ )                                                                                                                                                                              |
|         | 1      | 0: ( $\dot{\theta}_{T,B} \leq -2.91$ ) $\wedge$ ( $\theta_{F,B} \leq -0.39$ )<br>1: ( $\dot{\theta}_{T,B} > -2.91$ ) $\wedge$ ( $\dot{h}_R \leq -0.21$ ) $\wedge$ ( $\theta_{F,B} \leq -0.39$ )<br>2: ( $\dot{\theta}_{T,B} > -2.91$ ) $\wedge$ ( $\dot{h}_R > -0.21$ ) $\wedge$ ( $\theta_{F,B} \leq -0.39$ )<br>3: ( $\dot{\theta}_R \leq -0.00$ ) $\wedge$ ( $\theta_{F,B} > -0.39$ )<br>4: ( $\dot{\theta}_R > -0.00$ ) $\wedge$ ( $\theta_R \leq -0.04$ ) $\wedge$ ( $\theta_{F,B} > -0.39$ )<br>5: ( $\dot{\theta}_R > -0.00$ ) $\wedge$ ( $\theta_R > -0.04$ ) $\wedge$ ( $\theta_{F,B} > -0.39$ )                                                                                                                                                |
|         | 2      | 0: ( $\theta_R \leq 0.02$ ) $\wedge$ ( $\theta_{T,B} \leq -0.16$ )<br>1: ( $\theta_R \leq 0.02$ ) $\wedge$ ( $\theta_{T,B} > -0.16$ ) $\wedge$ ( $h_R \leq 0.00$ )<br>2: ( $\theta_R \leq 0.02$ ) $\wedge$ ( $\theta_{T,B} > -0.16$ ) $\wedge$ ( $h_R > 0.00$ )<br>3: ( $\theta_R > 0.02$ ) $\wedge$ ( $h_R \leq -0.02$ )<br>4: ( $\theta_R > 0.02$ ) $\wedge$ (conflict)<br>5: ( $\theta_R > 0.02$ ) $\wedge$ ( $h_R > -0.02$ )                                                                                                                                                                                                                                                                                                                         |
|         | 3      | 0: ( $\dot{h}_R \leq 0.55$ ) $\wedge$ ( $\theta_R \leq 0.08$ ) $\wedge$ ( $\theta_{T,B} \leq 0.42$ )<br>1: ( $\dot{h}_R > 0.55$ ) $\wedge$ ( $\theta_R \leq 0.08$ ) $\wedge$ ( $\theta_{T,B} \leq 0.42$ )<br>2: ( $\theta_R \leq 0.08$ ) $\wedge$ ( $\theta_{S,B} \leq 0.16$ ) $\wedge$ ( $\theta_{T,B} > 0.42$ )<br>3: ( $\theta_R \leq 0.08$ ) $\wedge$ ( $\theta_{S,B} > 0.16$ ) $\wedge$ ( $\theta_{T,B} > 0.42$ )<br>4: ( $\theta_R > 0.08$ ) $\wedge$ ( $\theta_{T,B} \leq 0.42$ ) $\wedge$ ( $h_R \leq -0.05$ )<br>5: ( $\theta_R > 0.08$ ) $\wedge$ ( $\theta_{T,B} \leq 0.42$ ) $\wedge$ ( $h_R > -0.05$ )<br>6: ( $\theta_R > 0.08$ ) $\wedge$ ( $\theta_{T,B} > 0.42$ )                                                                       |
|         | 4      | 0: ( $\dot{\theta}_{T,B} \leq -3.83$ ) $\wedge$ ( $\dot{\theta}_{T,F} \leq -0.87$ )<br>1: ( $\dot{\theta}_{T,B} \leq -3.83$ ) $\wedge$ ( $\dot{\theta}_{T,F} > -0.87$ ) $\wedge$ ( $h_R \leq -0.08$ )<br>2: ( $\dot{\theta}_{T,B} \leq -3.83$ ) $\wedge$ ( $\dot{\theta}_{T,F} > -0.87$ ) $\wedge$ ( $h_R > -0.08$ )<br>3: ( $\dot{\theta}_{T,B} > -3.83$ ) $\wedge$ ( $\theta_{S,B} \leq -0.11$ ) $\wedge$ ( $h_R \leq -0.09$ )<br>4: ( $\dot{\theta}_{T,B} > -3.83$ ) $\wedge$ ( $\theta_{S,B} > -0.11$ ) $\wedge$ ( $h_R \leq -0.09$ )<br>5: ( $\dot{\theta}_{T,B} > -3.83$ ) $\wedge$ ( $\theta_{T,B} \leq -0.33$ ) $\wedge$ ( $h_R > -0.09$ )<br>6: ( $\dot{\theta}_{T,B} > -3.83$ ) $\wedge$ ( $\theta_{T,B} > -0.33$ ) $\wedge$ ( $h_R > -0.09$ ) |
|         | 5      | 0: ( $\dot{x}_R \leq 3.31$ )<br>1: ( $\dot{x}_R > 3.31$ ) $\wedge$ ( $\theta_{S,B} \leq 0.01$ ) $\wedge$ ( $\theta_{T,F} \leq 0.57$ )<br>2: ( $\dot{x}_R > 3.31$ ) $\wedge$ ( $\theta_{S,B} > 0.01$ ) $\wedge$ ( $\theta_{T,F} \leq 0.57$ )<br>3: ( $\dot{x}_R > 3.31$ ) $\wedge$ ( $\theta_{T,F} > 0.57$ )                                                                                                                                                                                                                                                                                                                                                                                                                                              |
|         | 6      | 0: ( $\dot{\theta}_{T,B} \leq 1.22$ ) $\wedge$ ( $\theta_{S,B} \leq -0.54$ )<br>1: ( $\dot{\theta}_{T,B} > 1.22$ ) $\wedge$ ( $\theta_{S,B} \leq -0.54$ )<br>2: ( $\dot{\theta}_{T,B} \leq -3.70$ ) $\wedge$ ( $\theta_{S,B} > -0.54$ ) $\wedge$ ( $\theta_{T,B} \leq 0.16$ )<br>3: ( $\dot{\theta}_{T,B} \leq -3.70$ ) $\wedge$ ( $\theta_{S,B} > -0.54$ ) $\wedge$ ( $\theta_{T,B} > 0.16$ )<br>4: ( $\dot{\theta}_{T,B} > -3.70$ ) $\wedge$ (conflict)<br>5: ( $\dot{\theta}_{T,B} > -3.70$ ) $\wedge$ ( $\theta_{S,B} > -0.54$ )                                                                                                                                                                                                                     |
|         | 7      | 0: ( $\dot{h}_R \leq 0.02$ ) $\wedge$ ( $\theta_{S,F} \leq -0.19$ ) $\wedge$ ( $\theta_{T,B} \leq 0.53$ )<br>1: ( $\dot{h}_R \leq 0.02$ ) $\wedge$ ( $\theta_{S,F} \leq -0.19$ ) $\wedge$ ( $\theta_{T,B} > 0.53$ )<br>2: ( $\dot{h}_R > 0.02$ ) $\wedge$ ( $\theta_{S,F} \leq -0.19$ )<br>3: ( $\dot{\theta}_R \leq 0.53$ ) $\wedge$ ( $\theta_{S,F} \leq 0.16$ ) $\wedge$ ( $\theta_{S,F} > -0.19$ )<br>4: ( $\dot{\theta}_R \leq 0.53$ ) $\wedge$ ( $\theta_{S,F} > 0.16$ )<br>5: ( $\dot{\theta}_R > 0.53$ ) $\wedge$ ( $\theta_{S,F} > -0.19$ )                                                                                                                                                                                                     |
|         | 8      | 0: ( $\dot{\theta}_{T,B} \leq -0.39$ ) $\wedge$ ( $\theta_{T,B} \leq -0.37$ )<br>1: ( $\dot{\theta}_{T,B} \leq -0.39$ ) $\wedge$ ( $\theta_{S,B} \leq 0.04$ ) $\wedge$ ( $\theta_{T,B} > -0.37$ )<br>2: ( $\dot{\theta}_{T,B} \leq -0.39$ ) $\wedge$ ( $\theta_{S,B} > 0.04$ ) $\wedge$ ( $\theta_{T,B} > -0.37$ )<br>3: ( $\dot{\theta}_{T,B} > -0.39$ ) $\wedge$ ( $\theta_{T,B} \leq 0.55$ ) $\wedge$ ( $\theta_{T,F} \leq 0.09$ )<br>4: ( $\dot{\theta}_{T,B} > -0.39$ ) $\wedge$ ( $\theta_{T,B} \leq 0.55$ ) $\wedge$ ( $\theta_{T,F} > 0.09$ )<br>5: ( $\dot{\theta}_{T,B} > -0.39$ ) $\wedge$ ( $\theta_{T,B} > 0.55$ )                                                                                                                          |
|         | 9      | 0: ( $\theta_{T,F} \leq -0.24$ )<br>1: ( $\dot{\theta}_{T,F} \leq -6.60$ ) $\wedge$ (conflict)<br>2: ( $\dot{\theta}_{T,F} > -6.60$ ) $\wedge$ (conflict)<br>3: ( $\theta_{T,F} > -0.24$ ) $\wedge$ ( $h_R \leq -0.11$ )<br>4: ( $\theta_{T,F} \leq 0.32$ ) $\wedge$ ( $\theta_{T,F} > -0.24$ ) $\wedge$ ( $h_R > -0.11$ )<br>5: ( $\theta_{T,F} > 0.32$ ) $\wedge$ ( $h_R > -0.11$ )                                                                                                                                                                                                                                                                                                                                                                    |

Table 26: Logic program of ODE-RNN in locomotion (HalfCheetah).

| Model | Neuron | Logic Program                                                                                                                                                                                                                                                                                                                                                                                                                                                                                                                                                                                                                                                                                                                                                                            |
|-------|--------|------------------------------------------------------------------------------------------------------------------------------------------------------------------------------------------------------------------------------------------------------------------------------------------------------------------------------------------------------------------------------------------------------------------------------------------------------------------------------------------------------------------------------------------------------------------------------------------------------------------------------------------------------------------------------------------------------------------------------------------------------------------------------------------|
| CfC   | 0      | 0: ( $\dot{\theta}_{F,F} \leq -9.40$ )<br>1: ( $\dot{\theta}_{F,F} > -9.40$ ) $\wedge$ ( $\dot{\theta}_{T,B} \leq -1.68$ ) $\wedge$ ( $\theta_{F,F} \leq 0.23$ )<br>2: ( $\dot{\theta}_{F,F} > -9.40$ ) $\wedge$ ( $\dot{\theta}_{T,B} > -1.68$ ) $\wedge$ ( $\theta_{F,F} \leq 0.23$ )<br>3: ( $\dot{\theta}_{F,F} > -9.40$ ) $\wedge$ ( $\dot{\theta}_{T,F} \leq -5.69$ ) $\wedge$ ( $\theta_{F,F} > 0.23$ )<br>4: ( $\dot{\theta}_{F,F} > -9.40$ ) $\wedge$ ( $\theta_{T,F} > -5.69$ ) $\wedge$ ( $\theta_{F,F} > 0.23$ )                                                                                                                                                                                                                                                             |
|       | 1      | 0: ( $\theta_R \leq 0.06$ ) $\wedge$ ( $\theta_{T,F} \leq -0.46$ )<br>1: ( $\theta_R > 0.06$ ) $\wedge$ ( $\theta_{T,F} \leq -0.46$ )<br>2: ( $\theta_R \leq 0.02$ ) $\wedge$ ( $\theta_{T,F} > -0.46$ )<br>3: ( $\theta_R > 0.02$ ) $\wedge$ (conflict)<br>4: ( $\theta_R > 0.02$ ) $\wedge$ ( $\theta_{T,F} > -0.46$ )                                                                                                                                                                                                                                                                                                                                                                                                                                                                 |
|       | 2      | 0: ( $\dot{\theta}_{T,B} \leq 1.92$ ) $\wedge$ ( $\dot{\theta}_{T,F} \leq -0.59$ ) $\wedge$ ( $\dot{h}_R \leq 0.43$ )<br>1: ( $\dot{\theta}_{T,B} \leq 1.92$ ) $\wedge$ ( $\dot{\theta}_{T,F} > -0.59$ ) $\wedge$ ( $\dot{h}_R \leq 0.43$ )<br>2: ( $\dot{\theta}_{T,B} > 1.92$ ) $\wedge$ ( $\dot{\theta}_{T,F} \leq 5.02$ ) $\wedge$ ( $\dot{h}_R \leq 0.43$ )<br>3: ( $\dot{\theta}_{T,B} > 1.92$ ) $\wedge$ ( $\dot{\theta}_{T,F} > 5.02$ ) $\wedge$ ( $\dot{h}_R \leq 0.43$ )<br>4: ( $\dot{\theta}_{S,F} \leq 13.53$ ) $\wedge$ ( $\dot{h}_R > 0.43$ ) $\wedge$ ( $\theta_{F,B} \leq -0.01$ )<br>5: ( $\dot{\theta}_{S,F} \leq 13.53$ ) $\wedge$ ( $\dot{h}_R > 0.43$ ) $\wedge$ ( $\theta_{F,B} > -0.01$ )<br>6: ( $\dot{\theta}_{S,F} > 13.53$ ) $\wedge$ ( $\dot{h}_R > 0.43$ ) |
|       | 3      | 0: ( $\dot{\theta}_{T,F} \leq 8.70$ ) $\wedge$ ( $\theta_{S,F} \leq 0.53$ ) $\wedge$ ( $h_R \leq -0.09$ )<br>1: ( $\dot{\theta}_{T,F} \leq 8.70$ ) $\wedge$ ( $\theta_{S,F} \leq 0.53$ ) $\wedge$ ( $h_R > -0.09$ )<br>2: ( $\dot{\theta}_{T,F} \leq 8.70$ ) $\wedge$ ( $\theta_{S,F} > 0.53$ )<br>3: ( $\dot{\theta}_{T,F} > 8.70$ ) $\wedge$ ( $\theta_R \leq 0.20$ )<br>4: ( $\dot{\theta}_{T,F} > 8.70$ ) $\wedge$ ( $\theta_R > 0.20$ )                                                                                                                                                                                                                                                                                                                                             |
|       | 4      | 0: ( $\theta_{T,F} \leq -0.51$ ) $\wedge$ ( $h_R \leq -0.04$ )<br>1: ( $\theta_{T,F} \leq -0.51$ ) $\wedge$ ( $h_R > -0.04$ )<br>2: ( $\dot{\theta}_{T,B} \leq 0.58$ ) $\wedge$ ( $\theta_{T,F} \leq 0.50$ ) $\wedge$ ( $\theta_{T,F} > -0.51$ )<br>3: ( $\dot{\theta}_{T,B} \leq 0.58$ ) $\wedge$ ( $\theta_{T,F} > 0.50$ )<br>4: ( $\dot{\theta}_{T,B} > 0.58$ ) $\wedge$ ( $\dot{h}_R \leq -0.44$ ) $\wedge$ ( $\theta_{T,F} > -0.51$ )<br>5: ( $\dot{\theta}_{T,B} > 0.58$ ) $\wedge$ ( $\dot{h}_R > -0.44$ ) $\wedge$ ( $\theta_{T,F} > -0.51$ )                                                                                                                                                                                                                                    |
|       | 5      | 0: ( $\dot{\theta}_{T,B} \leq 2.61$ ) $\wedge$ ( $\theta_{S,F} \leq 0.08$ ) $\wedge$ ( $h_R \leq 0.03$ )<br>1: ( $\dot{\theta}_{T,B} \leq 2.61$ ) $\wedge$ ( $\theta_{S,F} \leq 0.08$ ) $\wedge$ ( $h_R > 0.03$ )<br>2: ( $\dot{\theta}_R \leq 0.63$ ) $\wedge$ ( $\dot{\theta}_{T,B} \leq 2.61$ ) $\wedge$ ( $\theta_{S,F} > 0.08$ )<br>3: ( $\dot{\theta}_R > 0.63$ ) $\wedge$ ( $\dot{\theta}_{T,B} \leq 2.61$ ) $\wedge$ ( $\theta_{S,F} > 0.08$ )<br>4: ( $\dot{\theta}_{T,B} > 2.61$ ) $\wedge$ ( $\theta_{T,F} \leq -0.13$ )<br>5: ( $\dot{\theta}_{T,B} > 2.61$ ) $\wedge$ ( $\theta_{T,F} > -0.13$ )                                                                                                                                                                            |
|       | 6      | 0: ( $\dot{\theta}_{T,B} \leq -0.60$ ) $\wedge$ ( $\theta_{F,F} \leq -0.11$ )<br>1: ( $\dot{\theta}_{T,B} > -0.60$ ) $\wedge$ ( $\theta_{F,F} \leq -0.11$ ) $\wedge$ ( $h_R \leq -0.09$ )<br>2: ( $\dot{\theta}_{T,B} > -0.60$ ) $\wedge$ ( $\theta_{F,F} \leq -0.11$ ) $\wedge$ ( $h_R > -0.09$ )<br>3: ( $\dot{\theta}_{S,F} \leq 11.48$ ) $\wedge$ ( $\theta_{F,F} > -0.11$ ) $\wedge$ ( $\theta_{T,B} \leq -0.10$ )<br>4: ( $\dot{\theta}_{S,F} \leq 11.48$ ) $\wedge$ ( $\theta_{F,F} > -0.11$ ) $\wedge$ ( $\theta_{T,B} > -0.10$ )<br>5: ( $\dot{\theta}_{S,F} > 11.48$ ) $\wedge$ ( $\theta_{F,F} > -0.11$ )                                                                                                                                                                     |
|       | 7      | 0: ( $\dot{\theta}_{T,F} \leq -8.38$ ) $\wedge$ ( $\dot{h}_R \leq 0.45$ ) $\wedge$ ( $\theta_{T,F} \leq 0.47$ )<br>1: ( $\dot{\theta}_{T,F} > -8.38$ ) $\wedge$ ( $\dot{h}_R \leq 0.45$ ) $\wedge$ ( $\theta_{T,F} \leq 0.47$ )<br>2: ( $\dot{h}_R > 0.45$ ) $\wedge$ ( $\theta_{F,F} \leq 0.14$ ) $\wedge$ ( $\theta_{T,F} \leq 0.47$ )<br>3: ( $\dot{h}_R > 0.45$ ) $\wedge$ ( $\theta_{F,F} > 0.14$ ) $\wedge$ ( $\theta_{T,F} \leq 0.47$ )<br>4: ( $\theta_{T,F} \leq 0.69$ ) $\wedge$ ( $\theta_{T,F} > 0.47$ )<br>5: ( $\theta_{T,F} > 0.69$ )                                                                                                                                                                                                                                     |
|       | 8      | 0: ( $\dot{\theta}_{T,B} \leq -6.34$ ) $\wedge$ ( $h_R \leq -0.02$ )<br>1: ( $\dot{\theta}_{T,B} > -6.34$ ) $\wedge$ ( $h_R \leq -0.02$ )<br>2: ( $\dot{\theta}_{T,B} > -6.34$ ) $\wedge$ (conflict)<br>3: ( $\dot{\theta}_{T,F} \leq 10.03$ ) $\wedge$ ( $\theta_{S,F} \leq 0.50$ ) $\wedge$ ( $h_R > -0.02$ )<br>4: ( $\dot{\theta}_{T,F} > 10.03$ ) $\wedge$ ( $\theta_{S,F} \leq 0.50$ ) $\wedge$ ( $h_R > -0.02$ )<br>5: ( $\theta_{S,F} > 0.50$ ) $\wedge$ ( $h_R > -0.02$ )                                                                                                                                                                                                                                                                                                       |
|       | 9      | 0: ( $\dot{\theta}_{T,B} \leq 1.14$ ) $\wedge$ ( $\theta_{S,B} \leq -0.06$ ) $\wedge$ ( $\theta_{S,F} \leq 0.46$ )<br>1: ( $\dot{\theta}_{T,B} \leq 1.14$ ) $\wedge$ ( $\theta_{S,B} > -0.06$ ) $\wedge$ ( $\theta_{S,F} \leq 0.46$ )<br>2: ( $\dot{\theta}_{T,B} \leq 1.14$ ) $\wedge$ ( $\theta_{S,F} > 0.46$ )<br>3: ( $\dot{\theta}_{T,B} > 1.14$ ) $\wedge$ ( $\theta_{T,F} \leq 0.56$ ) $\wedge$ ( $h_R \leq -0.10$ )<br>4: ( $\dot{\theta}_{T,B} > 1.14$ ) $\wedge$ ( $\theta_{T,F} \leq 0.56$ ) $\wedge$ ( $h_R > -0.10$ )<br>5: ( $\dot{\theta}_{T,B} > 1.14$ ) $\wedge$ ( $\theta_{T,F} > 0.56$ )                                                                                                                                                                              |

Table 27: Logic program of CfC in locomotion (HalfCheetah).

| Model | Neuron | Logic Program                                                                                                                                                                                                                                                                                                                                                                                                                                               |
|-------|--------|-------------------------------------------------------------------------------------------------------------------------------------------------------------------------------------------------------------------------------------------------------------------------------------------------------------------------------------------------------------------------------------------------------------------------------------------------------------|
| NCP   | 0      | 0: $(\theta_{F,B} \leq -0.05)$<br>1: $(\theta_{F,B} > -0.05)$                                                                                                                                                                                                                                                                                                                                                                                               |
|       | 1      | 0: $(\theta_{F,B} \leq -0.04)$<br>1: $(\theta_{F,B} > -0.04)$                                                                                                                                                                                                                                                                                                                                                                                               |
|       | 2      | 0: $(\theta_{T,B} \leq -0.29)$<br>1: $(\theta_{T,B} > -0.29)$                                                                                                                                                                                                                                                                                                                                                                                               |
|       | 3      | 0: $(\dot{\theta}_{T,F} \leq -6.91) \wedge (h_R \leq -0.08)$<br>1: $(\dot{\theta}_{T,F} \leq -6.91) \wedge (h_R > -0.08)$<br>2: $(\dot{\theta}_{T,F} > -6.91) \wedge (\theta_{F,F} \leq -0.13)$<br>3: $(\dot{\theta}_{T,F} > -6.91) \wedge (\theta_{F,F} > -0.13)$                                                                                                                                                                                          |
|       | 4      | 0: $(\dot{\theta}_{F,B} \leq -6.37) \wedge (\theta_{T,B} \leq -0.36)$<br>1: $(\dot{\theta}_{F,B} > -6.37) \wedge (\theta_{T,B} \leq -0.36)$<br>2: $(h_R \leq -0.59) \wedge (\theta_{T,B} \leq 0.59) \wedge (\theta_{T,B} > -0.36)$<br>3: $(h_R > -0.59) \wedge (\theta_{T,B} \leq 0.59) \wedge (\theta_{T,B} > -0.36)$<br>4: $(\dot{\theta}_{F,B} \leq 0.64) \wedge (\theta_{T,B} > 0.59)$<br>5: $(\dot{\theta}_{F,B} > 0.64) \wedge (\theta_{T,B} > 0.59)$ |
|       | 5      | 0: $(\theta_{F,B} \leq -0.02) \wedge (\theta_{T,B} \leq -0.40)$<br>1: $(\theta_{F,B} \leq -0.02) \wedge (\theta_{T,B} > -0.40)$<br>2: $(\theta_{F,B} > -0.02)$                                                                                                                                                                                                                                                                                              |
|       | 6      | 0: $(\dot{\theta}_{F,F} \leq -3.61) \wedge (\theta_{F,B} \leq -0.06)$<br>1: $(\dot{\theta}_{F,F} > -3.61) \wedge (\theta_{F,B} \leq -0.06)$<br>2: $(h_R \leq 0.51) \wedge (\theta_{F,B} > -0.06) \wedge (\theta_{T,F} \leq -0.70)$<br>3: $(h_R \leq 0.51) \wedge (\theta_{F,B} > -0.06) \wedge (\theta_{T,F} > -0.70)$<br>4: $(h_R > 0.51) \wedge (\theta_{F,B} > -0.06)$                                                                                   |
|       | 7      | 0: $(\theta_{T,B} \leq -0.27)$<br>1: (conflict)<br>2: $(\dot{\theta}_{S,F} \leq -8.45) \wedge (\dot{h}_R \leq 0.18) \wedge (\theta_{T,B} > -0.27)$<br>3: $(\dot{\theta}_{S,F} \leq -8.45) \wedge (\dot{h}_R > 0.18) \wedge (\theta_{T,B} > -0.27)$<br>4: $(\dot{\theta}_{S,F} > -8.45) \wedge (\theta_{F,B} \leq 0.22) \wedge (\theta_{T,B} > -0.27)$<br>5: $(\dot{\theta}_{S,F} > -8.45) \wedge (\theta_{F,B} > 0.22) \wedge (\theta_{T,B} > -0.27)$       |
|       | 8      | 0: $(\dot{\theta}_{F,B} \leq 6.33) \wedge (\dot{\theta}_{T,F} \leq 12.79) \wedge (\theta_{S,B} \leq -0.04)$<br>1: $(\dot{\theta}_{F,B} > 6.33) \wedge (\dot{\theta}_{T,F} \leq 12.79) \wedge (\theta_{S,B} \leq -0.04)$<br>2: $(\dot{\theta}_{T,F} \leq 12.79) \wedge (\theta_{S,B} > -0.04)$<br>3: $(\dot{\theta}_{T,F} > 12.79)$                                                                                                                          |
|       | 9      | 0: $(\dot{\theta}_{F,B} \leq 6.97) \wedge (h_R \leq -0.12)$<br>1: $(\dot{\theta}_{F,B} \leq 6.97) \wedge (\theta_{F,F} \leq 0.15) \wedge (h_R > -0.12)$<br>2: $(\dot{\theta}_{F,B} \leq 6.97) \wedge (\theta_{F,F} > 0.15) \wedge (h_R > -0.12)$<br>3: $(\dot{\theta}_{F,B} > 6.97) \wedge (\dot{\theta}_{S,B} \leq -8.53)$<br>4: $(\dot{\theta}_{F,B} > 6.97) \wedge (\dot{\theta}_{S,B} > -8.53)$                                                         |

Table 28: Logic program of NCP in locomotion (HalfCheetah).

| Model | Neuron | Logic Program                                                                                                                                                                                                                                                                                                                                          |
|-------|--------|--------------------------------------------------------------------------------------------------------------------------------------------------------------------------------------------------------------------------------------------------------------------------------------------------------------------------------------------------------|
| FC    | 0      | 0: $(\kappa \leq 0.00) \wedge (v \leq 7.40)$<br>1: $(\kappa \leq 0.00) \wedge (v \leq 7.71) \wedge (v > 7.40)$<br>2: $(\kappa > 0.00) \wedge (v \leq 7.71)$<br>3: $(\kappa \leq 0.00) \wedge (d \leq 0.12) \wedge (v > 7.71)$<br>4: $(\kappa \leq 0.00) \wedge (d > 0.12) \wedge (v > 7.71)$<br>5: $(\kappa > 0.00) \wedge (v > 7.71)$                 |
|       | 1      | 0: $(v \leq 7.30)$<br>1: $(\delta \leq 0.00) \wedge (d \leq 0.19) \wedge (v > 7.30)$<br>2: $(\delta \leq 0.00) \wedge (d > 0.19) \wedge (v > 7.30)$<br>3: $(\delta > 0.00) \wedge (d \leq 0.29) \wedge (v > 7.30)$<br>4: $(\delta > 0.00) \wedge (d > 0.29) \wedge (v > 7.30)$                                                                         |
|       | 2      | 0: $(\delta \leq -0.02) \wedge (\kappa \leq 0.02) \wedge (\mu \leq 0.01)$<br>1: $(\delta > -0.02) \wedge (\kappa \leq 0.02) \wedge (\mu \leq 0.01)$<br>2: $(\kappa > 0.02) \wedge (\mu \leq 0.01)$<br>3: $(\mu > 0.01)$                                                                                                                                |
|       | 3      | 0: $(\kappa \leq -0.00)$<br>1: $(\kappa > -0.00) \wedge (\mu \leq 0.01) \wedge (d \leq 0.07)$<br>2: $(\kappa > -0.00) \wedge (\mu \leq 0.01) \wedge (d > 0.07)$<br>3: $(\kappa > -0.00) \wedge (\mu \leq 0.02) \wedge (\mu > 0.01)$<br>4: $(\kappa > -0.00) \wedge (\mu > 0.02)$                                                                       |
|       | 4      | 0: $(\kappa \leq 0.00) \wedge (\mu \leq 0.01) \wedge (v \leq 7.66)$<br>1: $(\kappa \leq 0.00) \wedge (\mu \leq 0.01) \wedge (v > 7.66)$<br>2: $(\kappa \leq 0.00) \wedge (\mu > 0.01)$<br>3: $(\kappa > 0.00) \wedge (\mu \leq -0.02)$<br>4: $(\kappa > 0.00) \wedge (\mu \leq 0.01) \wedge (\mu > -0.02)$<br>5: $(\kappa > 0.00) \wedge (\mu > 0.01)$ |
|       | 5      | 0: $(\mu \leq 0.01) \wedge (v \leq 7.49)$<br>1: $(\delta \leq -0.02) \wedge (\mu \leq 0.01) \wedge (v > 7.49)$<br>2: $(\delta > -0.02) \wedge (\mu \leq 0.01) \wedge (v > 7.49)$<br>3: $(\mu \leq 0.02) \wedge (\mu > 0.01)$<br>4: $(\mu > 0.02)$                                                                                                      |
|       | 6      | 0: $(\kappa \leq -0.01)$<br>1: $(\delta \leq -0.01) \wedge (\kappa > -0.01) \wedge (\mu \leq 0.01)$<br>2: $(\delta > -0.01) \wedge (\kappa > -0.01) \wedge (\mu \leq 0.01)$<br>3: $(\kappa > -0.01) \wedge (\mu > 0.01)$                                                                                                                               |
|       | 7      | 0: $(\mu \leq -0.02)$<br>1: $(\delta \leq 0.02) \wedge (\mu \leq 0.01) \wedge (\mu > -0.02)$<br>2: $(\delta > 0.02) \wedge (\mu \leq 0.01) \wedge (\mu > -0.02)$<br>3: $(\mu > 0.01)$                                                                                                                                                                  |

Table 29: Logic program of FC in end-to-end visual servoing (Image-based Driving).

| Model | Neuron | Logic Program                                                                                                                                                                                                                                                                                                                                                                                                                                   |
|-------|--------|-------------------------------------------------------------------------------------------------------------------------------------------------------------------------------------------------------------------------------------------------------------------------------------------------------------------------------------------------------------------------------------------------------------------------------------------------|
| GRU   | 0      | 0: ( $d \leq -0.06$ )<br>1: ( $d \leq 0.11$ ) $\wedge$ ( $d > -0.06$ )<br>2: ( $d > 0.11$ )                                                                                                                                                                                                                                                                                                                                                     |
|       | 1      | 0: ( $\mu \leq 0.04$ )<br>1: ( $\mu \leq 0.09$ ) $\wedge$ ( $\mu > 0.04$ )<br>2: ( $\mu > 0.09$ )                                                                                                                                                                                                                                                                                                                                               |
|       | 2      | 0: ( $\mu \leq 0.04$ )<br>1: ( $\mu \leq 0.10$ ) $\wedge$ ( $\mu > 0.04$ )<br>2: ( $\mu > 0.10$ )                                                                                                                                                                                                                                                                                                                                               |
|       | 3      | 0: ( $v \leq 5.26$ )<br>1: ( $\mu \leq 0.01$ ) $\wedge$ ( $v \leq 6.88$ ) $\wedge$ ( $v > 5.26$ )<br>2: ( $\mu > 0.01$ ) $\wedge$ ( $v \leq 6.88$ ) $\wedge$ ( $v > 5.26$ )<br>3: ( $v \leq 7.34$ ) $\wedge$ ( $v > 6.88$ )<br>4: ( $v > 7.34$ )                                                                                                                                                                                                |
|       | 4      | 0: None                                                                                                                                                                                                                                                                                                                                                                                                                                         |
|       | 5      | 0: ( $v \leq 5.26$ )<br>1: ( $\mu \leq -0.01$ ) $\wedge$ ( $d \leq 0.20$ ) $\wedge$ ( $v > 5.26$ )<br>2: ( $\mu \leq -0.01$ ) $\wedge$ ( $d > 0.20$ ) $\wedge$ ( $v > 5.26$ )<br>3: ( $\mu > -0.01$ ) $\wedge$ ( $v \leq 6.81$ ) $\wedge$ ( $v > 5.26$ )<br>4: ( $\mu > -0.01$ ) $\wedge$ ( $v > 6.81$ )                                                                                                                                        |
|       | 6      | 0: ( $\delta \leq -0.04$ )<br>1: ( $\delta \leq 0.05$ ) $\wedge$ ( $\delta > -0.04$ ) $\wedge$ ( $v \leq 7.81$ )<br>2: ( $\delta \leq 0.05$ ) $\wedge$ ( $\delta > -0.04$ ) $\wedge$ ( $v > 7.81$ )<br>3: ( $\delta \leq 0.09$ ) $\wedge$ ( $\delta > 0.05$ )<br>4: ( $\delta > 0.09$ )                                                                                                                                                         |
|       | 7      | 0: ( $\kappa \leq 0.02$ ) $\wedge$ ( $\mu \leq -0.05$ ) $\wedge$ ( $d \leq 0.61$ )<br>1: ( $\kappa \leq 0.02$ ) $\wedge$ ( $\mu > -0.05$ ) $\wedge$ ( $d \leq 0.61$ )<br>2: ( $\kappa > 0.02$ ) $\wedge$ ( $d \leq 0.61$ )<br>3: ( $\delta \leq 0.06$ ) $\wedge$ ( $\mu \leq -0.04$ ) $\wedge$ ( $d > 0.61$ )<br>4: ( $\delta \leq 0.06$ ) $\wedge$ ( $\mu > -0.04$ ) $\wedge$ ( $d > 0.61$ )<br>5: ( $\delta > 0.06$ ) $\wedge$ ( $d > 0.61$ ) |

Table 30: Logic program of GRU in end-to-end visual servoing (Image-based Driving).

| Model | Neuron | Logic Program                                                                                                                                                                                                                                                                   |
|-------|--------|---------------------------------------------------------------------------------------------------------------------------------------------------------------------------------------------------------------------------------------------------------------------------------|
| LSTM  | 0      | 0: $(\kappa \leq 0.00) \wedge (d \leq 0.07)$<br>1: $(\kappa \leq 0.00) \wedge (d > 0.07)$<br>2: $(\kappa \leq 0.00) \wedge (\kappa > 0.00)$<br>3: $(\kappa > 0.00) \wedge (v \leq 7.58)$<br>4: $(\kappa > 0.00) \wedge (v > 7.58)$                                              |
|       | 1      | 0: $(d \leq -0.08) \wedge (v \leq 7.54)$<br>1: $(d \leq 0.04) \wedge (d > -0.08) \wedge (v \leq 7.54)$<br>2: $(d \leq 0.04) \wedge (v \leq 7.68) \wedge (v > 7.54)$<br>3: $(d \leq 0.04) \wedge (v > 7.68)$<br>4: $(d \leq 0.30) \wedge (d > 0.04)$<br>5: $(d > 0.30)$          |
|       | 2      | 0: $(\kappa \leq 0.00) \wedge (d \leq -0.11)$<br>1: $(\kappa > 0.00) \wedge (d \leq -0.11)$<br>2: $(d \leq 0.03) \wedge (d > -0.11) \wedge (v \leq 7.50)$<br>3: $(d \leq 0.03) \wedge (d > -0.11) \wedge (v > 7.50)$<br>4: $(d \leq 0.29) \wedge (d > 0.03)$<br>5: $(d > 0.29)$ |
|       | 3      | 0: $(v \leq 7.25)$<br>1: $(d \leq 0.03) \wedge (v \leq 7.66) \wedge (v > 7.25)$<br>2: $(d > 0.03) \wedge (v \leq 7.66) \wedge (v > 7.25)$<br>3: $(\delta \leq 0.00) \wedge (v > 7.66)$<br>4: $(\delta > 0.00) \wedge (v > 7.66)$                                                |
|       | 4      | 0: $(\delta \leq 0.05) \wedge (\kappa \leq 0.00) \wedge (d \leq 0.23)$<br>1: $(\delta \leq 0.05) \wedge (\kappa > 0.00) \wedge (d \leq 0.23)$<br>2: $(\delta \leq 0.05) \wedge (d > 0.23)$<br>3: $(\delta > 0.05)$                                                              |
|       | 5      | 0: $(\delta \leq 0.04)$<br>1: $(\delta > 0.04)$                                                                                                                                                                                                                                 |
|       | 6      | 0: None                                                                                                                                                                                                                                                                         |
|       | 7      | 0: $(\delta \leq -0.01) \wedge (v \leq 7.39)$<br>1: $(\delta > -0.01) \wedge (v \leq 7.39)$<br>2: $(\kappa \leq 0.02) \wedge (d \leq 0.01) \wedge (v > 7.39)$<br>3: $(\kappa > 0.02) \wedge (d \leq 0.01) \wedge (v > 7.39)$<br>4: $(d > 0.01) \wedge (v > 7.39)$               |

Table 31: Logic program of LSTM in end-to-end visual servoing (Image-based Driving).



| Model | Neuron | Logic Program                                                                                                                                                                                                                                                                                                          |
|-------|--------|------------------------------------------------------------------------------------------------------------------------------------------------------------------------------------------------------------------------------------------------------------------------------------------------------------------------|
| CfC   | 0      | 0: $(\delta \leq -0.03) \wedge (\mu \leq 0.02)$<br>1: $(\delta > -0.03) \wedge (\mu \leq -0.00)$<br>2: $(\delta > -0.03) \wedge (\mu \leq 0.02) \wedge (\mu > -0.00)$<br>3: $(\mu > 0.02) \wedge (v \leq 6.79)$<br>4: $(\mu > 0.02) \wedge (v > 6.79)$                                                                 |
|       | 1      | 0: $(\mu \leq -0.05)$<br>1: $(\delta \leq -0.03) \wedge (\mu > -0.05)$<br>2: $(\delta > -0.03) \wedge (\kappa \leq 0.00) \wedge (\mu > -0.05)$<br>3: $(\delta > -0.03) \wedge (\kappa > 0.00) \wedge (\mu > -0.05)$                                                                                                    |
|       | 2      | 0: $(\mu \leq 0.02) \wedge (d \leq 0.12) \wedge (v \leq 7.23)$<br>1: $(\mu \leq 0.02) \wedge (d \leq 0.12) \wedge (v > 7.23)$<br>2: $(\mu \leq 0.00) \wedge (d > 0.12)$<br>3: $(\mu \leq 0.02) \wedge (\mu > 0.00) \wedge (d > 0.12)$<br>4: $(\mu > 0.02) \wedge (v \leq 6.79)$<br>5: $(\mu > 0.02) \wedge (v > 6.79)$ |
|       | 3      | 0: $(\delta \leq -0.04)$<br>1: (conflict)<br>2: $(\delta > -0.04) \wedge (d \leq 0.16)$<br>3: $(\delta > -0.04) \wedge (d > 0.16)$                                                                                                                                                                                     |
|       | 4      | 0: $(\kappa \leq 0.00) \wedge (\mu \leq -0.00)$<br>1: $(\kappa > 0.00) \wedge (\mu \leq -0.00)$<br>2: $(\mu \leq 0.02) \wedge (\mu > -0.00) \wedge (d \leq 0.40)$<br>3: $(\mu \leq 0.02) \wedge (\mu > -0.00) \wedge (d > 0.40)$<br>4: $(\mu > 0.02) \wedge (v \leq 6.87)$<br>5: $(\mu > 0.02) \wedge (v > 6.87)$      |
|       | 5      | 0: $(v \leq 6.41)$<br>1: $(\mu \leq 0.00) \wedge (v \leq 7.15) \wedge (v > 6.41)$<br>2: $(\mu \leq 0.00) \wedge (v > 7.15)$<br>3: $(\mu > 0.00) \wedge (d \leq 0.51) \wedge (v > 6.41)$<br>4: $(\mu > 0.00) \wedge (d > 0.51) \wedge (v > 6.41)$                                                                       |
|       | 6      | 0: $(\delta \leq -0.00)$<br>1: (conflict)<br>2: $(\delta \leq 0.04) \wedge (\delta > -0.00) \wedge (v \leq 7.18)$<br>3: $(\delta \leq 0.04) \wedge (\delta > -0.00) \wedge (v > 7.18)$<br>4: $(\delta \leq 0.07) \wedge (\delta > 0.04)$<br>5: $(\delta > 0.07)$                                                       |
|       | 7      | 0: $(\delta \leq -0.02) \wedge (v \leq 7.26)$<br>1: $(\delta > -0.02) \wedge (v \leq 6.56)$<br>2: $(\delta > -0.02) \wedge (v \leq 7.26) \wedge (v > 6.56)$<br>3: $(\delta \leq 0.00) \wedge (v \leq 7.55) \wedge (v > 7.26)$<br>4: $(\delta > 0.00) \wedge (v \leq 7.55) \wedge (v > 7.26)$<br>5: $(v > 7.55)$        |

Table 32: Logic program of ODE-RNN in end-to-end visual servoing (Image-based Driving).

| Model   | Neuron | Logic Program                                                                                                                                                                                                                                                                                                                                                                                                |
|---------|--------|--------------------------------------------------------------------------------------------------------------------------------------------------------------------------------------------------------------------------------------------------------------------------------------------------------------------------------------------------------------------------------------------------------------|
| ODE-RNN | 0      | 0: $(d \leq -0.04) \wedge (v \leq 5.48)$<br>1: $(d \leq -0.04) \wedge (v \leq 7.46) \wedge (v > 5.48)$<br>2: $(\mu \leq 0.02) \wedge (d > -0.04) \wedge (v \leq 7.46)$<br>3: $(\mu > 0.02) \wedge (d > -0.04) \wedge (v \leq 7.46)$<br>4: $(\delta \leq 0.05) \wedge (v \leq 7.84) \wedge (v > 7.46)$<br>5: $(\delta \leq 0.05) \wedge (v > 7.84)$<br>6: $(\delta > 0.05) \wedge (v > 7.46)$                 |
|         | 1      | 0: $(d \leq -0.72)$<br>1: $(d > -0.72) \wedge (v \leq 5.80)$<br>2: $(\delta \leq -0.00) \wedge (d > -0.72) \wedge (v > 5.80)$<br>3: $(\delta > -0.00) \wedge (d > -0.72) \wedge (v > 5.80)$                                                                                                                                                                                                                  |
|         | 2      | 0: $(v \leq 5.00)$<br>1: $(\delta \leq 0.09) \wedge (v \leq 6.99) \wedge (v > 5.00)$<br>2: $(\delta \leq 0.09) \wedge (v > 6.99)$<br>3: $(\delta > 0.09) \wedge (v \leq 6.98) \wedge (v > 5.00)$<br>4: $(\delta > 0.09) \wedge (v > 6.98)$                                                                                                                                                                   |
|         | 3      | 0: $(d \leq -0.04)$<br>1: $(d \leq 0.04) \wedge (d > -0.04)$<br>2: $(\mu \leq -0.11) \wedge (d > 0.04)$<br>3: $(\mu > -0.11) \wedge (d \leq 0.92) \wedge (d > 0.04)$<br>4: $(\mu > -0.11) \wedge (d > 0.92)$                                                                                                                                                                                                 |
|         | 4      | 0: $(\mu \leq 0.02) \wedge (d \leq 0.60) \wedge (v \leq 7.04)$<br>1: $(\mu \leq 0.02) \wedge (d > 0.60) \wedge (v \leq 7.04)$<br>2: $(\mu > 0.02) \wedge (d \leq -0.43) \wedge (v \leq 7.04)$<br>3: $(\mu > 0.02) \wedge (d > -0.43) \wedge (v \leq 7.04)$<br>4: $(v \leq 7.53) \wedge (v > 7.04)$<br>5: $(d \leq 0.38) \wedge (v > 7.53)$<br>6: $(d > 0.38) \wedge (v > 7.53)$                              |
|         | 5      | 0: $(v \leq 5.38)$<br>1: $(\delta \leq -0.03) \wedge (d \leq 0.10) \wedge (v > 5.38)$<br>2: $(\delta > -0.03) \wedge (d \leq 0.10) \wedge (v > 5.38)$<br>3: $(\delta \leq -0.02) \wedge (d > 0.10) \wedge (v > 5.38)$<br>4: $(\delta > -0.02) \wedge (d > 0.10) \wedge (v > 5.38)$                                                                                                                           |
|         | 6      | 0: $(\mu \leq 0.01) \wedge (d \leq 0.18)$<br>1: $(\mu \leq 0.01) \wedge (d \leq 0.47) \wedge (d > 0.18)$<br>2: $(\delta \leq 0.10) \wedge (\mu > 0.01) \wedge (d \leq 0.47)$<br>3: $(\delta > 0.10) \wedge (\mu > 0.01) \wedge (d \leq 0.47)$<br>4: $(d > 0.47) \wedge (v \leq 6.60)$<br>5: $(\mu \leq -0.00) \wedge (d > 0.47) \wedge (v > 6.60)$<br>6: $(\mu > -0.00) \wedge (d > 0.47) \wedge (v > 6.60)$ |
|         | 7      | 0: $(v \leq 5.15)$<br>1: $(\mu \leq 0.12) \wedge (d \leq -0.08) \wedge (v > 5.15)$<br>2: $(\mu \leq 0.12) \wedge (d > -0.08) \wedge (v > 5.15)$<br>3: $(\mu > 0.12) \wedge (v > 5.15)$                                                                                                                                                                                                                       |

Table 33: Logic program of CfC in end-to-end visual servoing (Image-based Driving).

| Model | Neuron | Logic Program                                                                                                                                                                                                                                                                                                                                                                                                    |
|-------|--------|------------------------------------------------------------------------------------------------------------------------------------------------------------------------------------------------------------------------------------------------------------------------------------------------------------------------------------------------------------------------------------------------------------------|
| NCP   | 0      | 0: ( $\delta \leq -0.05$ )<br>1: ( $\delta \leq 0.02$ ) $\wedge$ ( $\delta > -0.05$ ) $\wedge$ ( $\mu \leq -0.01$ )<br>2: ( $\delta \leq 0.02$ ) $\wedge$ ( $\delta > -0.05$ ) $\wedge$ ( $\mu > -0.01$ )<br>3: ( $\delta \leq 0.09$ ) $\wedge$ ( $\delta > 0.02$ ) $\wedge$ ( $\mu \leq -0.01$ )<br>4: ( $\delta \leq 0.09$ ) $\wedge$ ( $\delta > 0.02$ ) $\wedge$ ( $\mu > -0.01$ )<br>5: ( $\delta > 0.09$ ) |
|       | 1      | 0: ( $\mu \leq 0.05$ )<br>1: ( $\mu > 0.05$ )                                                                                                                                                                                                                                                                                                                                                                    |
|       | 2      | 0: ( $\delta \leq 0.02$ ) $\wedge$ ( $\mu \leq -0.03$ )<br>1: ( $\delta > 0.02$ ) $\wedge$ ( $\mu \leq -0.03$ )<br>2: ( $\delta \leq -0.02$ ) $\wedge$ ( $\mu > -0.03$ )<br>3: ( $\delta > -0.02$ ) $\wedge$ ( $\mu > -0.03$ )                                                                                                                                                                                   |
|       | 3      | 0: ( $v \leq 7.41$ )<br>1: ( $v \leq 7.72$ ) $\wedge$ ( $v > 7.41$ )<br>2: ( $d \leq -0.02$ ) $\wedge$ ( $v > 7.72$ )<br>3: ( $d \leq 0.10$ ) $\wedge$ ( $d > -0.02$ ) $\wedge$ ( $v > 7.72$ )<br>4: ( $d > 0.10$ ) $\wedge$ ( $v \leq 8.05$ ) $\wedge$ ( $v > 7.72$ )<br>5: ( $d > 0.10$ ) $\wedge$ ( $v > 8.05$ )                                                                                              |
|       | 4      | 0: ( $v \leq 7.45$ )<br>1: ( $v \leq 7.78$ ) $\wedge$ ( $v > 7.45$ )<br>2: ( $v \leq 8.08$ ) $\wedge$ ( $v > 7.78$ )<br>3: ( $v > 8.08$ )                                                                                                                                                                                                                                                                        |
|       | 5      | 0: ( $d \leq -0.15$ ) $\wedge$ ( $v \leq 7.65$ )<br>1: ( $d \leq -0.15$ ) $\wedge$ ( $v > 7.65$ )<br>2: ( $\mu \leq 0.06$ ) $\wedge$ ( $d \leq 0.04$ ) $\wedge$ ( $d > -0.15$ )<br>3: ( $\mu \leq 0.06$ ) $\wedge$ ( $d > 0.04$ )<br>4: ( $\mu > 0.06$ ) $\wedge$ ( $d > -0.15$ )                                                                                                                                |
|       | 6      | 0: ( $\delta \leq -0.03$ ) $\wedge$ ( $v \leq 7.73$ )<br>1: ( $\delta \leq -0.03$ ) $\wedge$ ( $v > 7.73$ )<br>2: ( $\delta > -0.03$ ) $\wedge$ ( $\mu \leq 0.07$ ) $\wedge$ ( $d \leq 0.02$ )<br>3: ( $\delta > -0.03$ ) $\wedge$ ( $\mu \leq 0.07$ ) $\wedge$ ( $d > 0.02$ )<br>4: ( $\delta > -0.03$ ) $\wedge$ ( $\mu > 0.07$ )                                                                              |
|       | 7      | 0: None                                                                                                                                                                                                                                                                                                                                                                                                          |

Table 34: Logic program of NCP in end-to-end visual servoing (Image-based Driving).

## References

- [1] Y. Bengio, A. Courville, and P. Vincent. Representation learning: A review and new perspectives. *IEEE transactions on pattern analysis and machine intelligence*, 35(8):1798–1828, 2013.
- [2] M. Lechner, R. Hasani, M. Zimmer, T. A. Henzinger, and R. Grosu. Designing worm-inspired neural networks for interpretable robotic control. In *2019 International Conference on Robotics and Automation (ICRA)*, pages 87–94. IEEE, 2019.
- [3] R. Hasani, M. Lechner, A. Amini, D. Rus, and R. Grosu. Liquid time-constant networks. *arXiv preprint arXiv:2006.04439*, 2020.
- [4] M. Lechner, R. Hasani, A. Amini, T. A. Henzinger, D. Rus, and R. Grosu. Neural circuit policies enabling auditable autonomy. *Nature Machine Intelligence*, 2(10):642–652, 2020.
- [5] C. Vorbach, R. Hasani, A. Amini, M. Lechner, and D. Rus. Causal navigation by continuous-time neural networks. *Advances in Neural Information Processing Systems*, 34, 2021.
- [6] J. Schmidhuber. Learning factorial codes by predictability minimization. *Neural computation*, 4(6):863–879, 1992.
- [7] J. Peters, D. Janzing, and B. Schölkopf. *Elements of causal inference: foundations and learning algorithms*. The MIT Press, 2017.
- [8] F. Locatello, S. Bauer, M. Lucic, G. Raetsch, S. Gelly, B. Schölkopf, and O. Bachem. Challenging common assumptions in the unsupervised learning of disentangled representations. In *international conference on machine learning*, pages 4114–4124. PMLR, 2019.
- [9] S. Emmons, B. Eysenbach, I. Kostrikov, and S. Levine. Rvs: What is essential for offline RL via supervised learning? In *International Conference on Learning Representations*, 2022. URL <https://openreview.net/forum?id=S874XA1pkR->.
- [10] C. R. Banbury, V. J. Reddi, M. Lam, W. Fu, A. Fazel, J. Holleman, X. Huang, R. Hurtado, D. Kanter, A. Lokhmotov, et al. Benchmarking tinymml systems: Challenges and direction. *arXiv preprint arXiv:2003.04821*, 2020.
- [11] C. Baykal, L. Liebenwein, I. Gilitschenski, D. Feldman, and D. Rus. Sensitivity-informed provable pruning of neural networks. *SIAM Journal on Mathematics of Data Science*, 4(1):26–45, 2022. doi:10.1137/20M1383239. URL <https://doi.org/10.1137/20M1383239>.
- [12] C. Hawkins, X. Liu, and Z. Zhang. Towards compact neural networks via end-to-end training: A bayesian tensor approach with automatic rank determination. *SIAM Journal on Mathematics of Data Science*, 4(1):46–71, 2022. doi:10.1137/21M1391444. URL <https://doi.org/10.1137/21M1391444>.
- [13] S. Oymak. Learning compact neural networks with regularization. In J. Dy and A. Krause, editors, *Proceedings of the 35th International Conference on Machine Learning*, volume 80 of *Proceedings of Machine Learning Research*, pages 3966–3975. PMLR, 10–15 Jul 2018. URL <https://proceedings.mlr.press/v80/oymak18a.html>.
- [14] J. Bu, A. Daw, M. Maruf, and A. Karpatne. Learning compact representations of neural networks using discriminative masking (dam). *Advances in Neural Information Processing Systems*, 34, 2021.
- [15] M. Torkamani, P. Wallis, S. Shankar, and A. Rooshenas. Learning compact neural networks using ordinary differential equations as activation functions. *arXiv preprint arXiv:1905.07685*, 2019.

- [16] B. A. Toms, E. A. Barnes, and I. Ebert-Uphoff. Physically interpretable neural networks for the geosciences: Applications to earth system variability. *Journal of Advances in Modeling Earth Systems*, 12(9):e2019MS002002, 2020.
- [17] R. Hasani, A. Amini, M. Lechner, F. Naser, R. Grosu, and D. Rus. Response characterization for auditing cell dynamics in long short-term memory networks. In *2019 International Joint Conference on Neural Networks (IJCNN)*, pages 1–8. IEEE, 2019.
- [18] D. Alvarez Melis and T. Jaakkola. Towards robust interpretability with self-explaining neural networks. *Advances in neural information processing systems*, 31, 2018.
- [19] Q. Zhang, Y. N. Wu, and S.-C. Zhu. Interpretable convolutional neural networks. In *Proceedings of the IEEE conference on computer vision and pattern recognition*, pages 8827–8836, 2018.
- [20] R. T. Chen, X. Li, R. B. Grosse, and D. K. Duvenaud. Isolating sources of disentanglement in variational autoencoders. *Advances in neural information processing systems*, 31, 2018.
- [21] A. Heuillet, F. Couthouis, and N. Díaz-Rodríguez. Explainability in deep reinforcement learning. *Knowledge-Based Systems*, 214:106685, 2021.
- [22] O. Bastani, Y. Pu, and A. Solar-Lezama. Verifiable reinforcement learning via policy extraction. *Advances in neural information processing systems*, 31, 2018.
- [23] A. Silva, M. Gombolay, T. Killian, I. Jimenez, and S.-H. Son. Optimization methods for interpretable differentiable decision trees applied to reinforcement learning. In *International conference on artificial intelligence and statistics*, pages 1855–1865. PMLR, 2020.
- [24] Z. Ding, P. Hernandez-Leal, G. W. Ding, C. Li, and R. Huang. Cdt: Cascading decision trees for explainable reinforcement learning. *arXiv preprint arXiv:2011.07553*, 2020.
- [25] A. Pace, A. J. Chan, and M. van der Schaar. Poetree: Interpretable policy learning with adaptive decision trees. *arXiv preprint arXiv:2203.08057*, 2022.
- [26] D. Amir and O. Amir. Highlights: Summarizing agent behavior to people. In *Proceedings of the 17th International Conference on Autonomous Agents and MultiAgent Systems*, pages 1168–1176, 2018.
- [27] N. Topin and M. Veloso. Generation of policy-level explanations for reinforcement learning. In *Proceedings of the AAAI Conference on Artificial Intelligence*, volume 33, pages 2514–2521, 2019.
- [28] K. Ridgeway and M. C. Mozer. Learning deep disentangled embeddings with the f-statistic loss. *Advances in neural information processing systems*, 31, 2018.
- [29] K. Cho, B. Van Merriënboer, D. Bahdanau, and Y. Bengio. On the properties of neural machine translation: Encoder-decoder approaches. *arXiv preprint arXiv:1409.1259*, 2014.
- [30] S. Hochreiter and J. Schmidhuber. Long short-term memory. *Neural computation*, 9(8):1735–1780, 1997.
- [31] Y. Rubanova, R. T. Chen, and D. K. Duvenaud. Latent ordinary differential equations for irregularly-sampled time series. *Advances in neural information processing systems*, 32, 2019.
- [32] R. Hasani, M. Lechner, A. Amini, L. Liebenwein, M. Tschaikowski, G. Teschl, and D. Rus. Closed-form continuous-depth models. *arXiv preprint arXiv:2106.13898*, 2021.
- [33] I. Lage, E. Chen, J. He, M. Narayanan, B. Kim, S. Gershman, and F. Doshi-Velez. An evaluation of the human-interpretability of explanation. *arXiv preprint arXiv:1902.00006*, 2019.

- [34] H. Lakkaraju, S. H. Bach, and J. Leskovec. Interpretable decision sets: A joint framework for description and prediction. In *Proceedings of the 22nd ACM SIGKDD international conference on knowledge discovery and data mining*, pages 1675–1684, 2016.
- [35] G. Brockman, V. Cheung, L. Pettersson, J. Schneider, J. Schulman, J. Tang, and W. Zaremba. Openai gym. *arXiv preprint arXiv:1606.01540*, 2016.
- [36] J. Schulman, F. Wolski, P. Dhariwal, A. Radford, and O. Klimov. Proximal policy optimization algorithms. *arXiv preprint arXiv:1707.06347*, 2017.
- [37] A. Amini, T.-H. Wang, I. Gilitschenski, W. Schwarting, Z. Liu, S. Han, S. Karaman, and D. Rus. Vista 2.0: An open, data-driven simulator for multimodal sensing and policy learning for autonomous vehicles. In *2022 International Conference on Robotics and Automation (ICRA)*. IEEE, 2022.
- [38] A. Camacho and S. A. McIlraith. Learning interpretable models expressed in linear temporal logic. In *Proceedings of the International Conference on Automated Planning and Scheduling*, volume 29, pages 621–630, 2019.
- [39] L. Console, C. Picardi, and D. T. Duprè. Temporal decision trees: Model-based diagnosis of dynamic systems on-board. *Journal of artificial intelligence research*, 19:469–512, 2003.
- [40] R. T. Chen, Y. Rubanova, J. Bettencourt, and D. K. Duvenaud. Neural ordinary differential equations. *Advances in neural information processing systems*, 31, 2018.
- [41] J. Frankle and M. Carbin. The lottery ticket hypothesis: Finding sparse, trainable neural networks. In *International Conference on Learning Representations*, 2018.
- [42] L. Liebenwein, R. Hasani, A. Amini, and D. Rus. Sparse flows: Pruning continuous-depth models. *Advances in Neural Information Processing Systems*, 34, 2021.
- [43] L. Liebenwein, C. Baykal, B. Carter, D. Gifford, and D. Rus. Lost in pruning: The effects of pruning neural networks beyond test accuracy. *Proceedings of Machine Learning and Systems*, 3:93–138, 2021.
- [44] L. Li, T. J. Walsh, and M. L. Littman. Towards a unified theory of state abstraction for mdps. In *AI&M*, 2006.
- [45] T. D. Kulkarni, K. Narasimhan, A. Saeedi, and J. Tenenbaum. Hierarchical deep reinforcement learning: Integrating temporal abstraction and intrinsic motivation. *Advances in neural information processing systems*, 29, 2016.
- [46] E. S. Spelke and K. D. Kinzler. Core knowledge. *Developmental science*, 10(1):89–96, 2007.
- [47] T. Dean and R. Givan. Model minimization in markov decision processes. In *AAAI/IAAI*, pages 106–111, 1997.
- [48] E. van der Pol, T. Kipf, F. A. Oliehoek, and M. Welling. Plannable approximations to mdp homomorphisms: Equivariance under actions. *arXiv preprint arXiv:2002.11963*, 2020.
- [49] I. Higgins, D. Amos, D. Pfau, S. Racaniere, L. Matthey, D. Rezende, and A. Lerchner. Towards a definition of disentangled representations. *arXiv preprint arXiv:1812.02230*, 2018.
- [50] H. Caselles-Dupré, M. Garcia Ortiz, and D. Filliat. Symmetry-based disentangled representation learning requires interaction with environments. *Advances in Neural Information Processing Systems*, 32, 2019.
